# Supplementary material
Source: PubMed Central journal article supplement (PMC9856237)

## Supplemental Online Content

Messier SP, Beavers DP, Queen K, et al. Effect of diet and exercise on knee pain in patients with osteoarthritis and overweight or obesity: a randomized clinical trial. *JAMA*. Published December 13, 2022. doi:10.1001/jama.2022.21893

**eTable 1.** Baseline Demographic and Clinical Characteristics for Patients for Whom Outcome Data Were Available

**eTable 2.** Comparison of Baseline Values of Completers Versus Non-Completers (No Follow-up Data)

**eTable 3.** Primary and Pre-Specified Secondary Outcomes Using Site as a Random Effect

**eTable 4.** Between Group Differences at 18-Month Follow-up for Primary and Secondary Outcomes Using Multiple Imputation

**eTable 5A.** Adverse Events Definitely Related to the Study by Group Assignment

**eTable 5B.** Knee Replacement and Intraarticular Knee Injections by Group Assignment

**eTable 6.** Comparison of 18-Month Outcomes With Versus Without Participants That Were Active During COVID

**eTable 7.** Number and Percent of Meal Replacement Use for the Diet and Exercise and Control Groups

**eFigure 1.** Unadjusted Mean (95% CI) Body Weight Across the 18-Month Intervention Period for the Diet and Exercise and Control Groups

**eFigure 2.** Change in Weight Versus Change in Pain for the Diet and Exercise Group

**eFigure 3.** Change in Weight Versus Change in Pain for the Control Group

This supplemental material has been provided by the authors to give readers additional information about their work.

**eTable 1. Demographic and Clinical Characteristics of the Study Participants at Baseline Using Completers Only.**

| Baseline Characteristics                                                            | Diet + Exercise | Control      |
|-------------------------------------------------------------------------------------|-----------------|--------------|
| No.                                                                                 | 377             | 343          |
| Age, mean (SD), y                                                                   | 64.9 (7.7)      | 65.1 (7.7)   |
| Weight, mean (SD), kg                                                               | 99.6 (19.3)     | 100.8 (22.2) |
| Height, mean (SD), ft                                                               | 5.4 ± .3        | 5.5 ±.3      |
| BMI, mean (SD), kg/m <sup>2</sup>                                                   | 36.4 (6.1)      | 36.7 (7.2)   |
| Sex, No. (%)                                                                        |                 |              |
| Women                                                                               | 290 (76.9)      | 262 (76.4)   |
| Men                                                                                 | 87 (23.1)       | 81 (23.6)    |
| Race, No. (%) <sup>a</sup>                                                          |                 |              |
| White                                                                               | 268 (71.1)      | 231 (67.3)   |
| Black                                                                               | 96 (25.5)       | 103 (30.0)   |
| Annual household income, No. (%) <sup>b</sup>                                       |                 |              |
| <\$20 000                                                                           | 47 (13)         | 56 (17)      |
| \$20 000-\$34 999                                                                   | 58 (16)         | 57 (17)      |
| \$35 000-\$49 999                                                                   | 62 (17)         | 54 (16)      |
| \$50 000-\$74,999                                                                   | 85 (24)         | 82 (25)      |
| \$75,000-\$99,999                                                                   | 48 (13)         | 38 (11)      |
| ≥\$100,000                                                                          | 60 (17)         | 46 (14)      |
| Education, No. (%) <sup>b</sup>                                                     |                 |              |
| < High School                                                                       | 10 (2.7)        | 7(2.0)       |
| High School or Equivalent                                                           | 37 (9.8)        | 49 (14.3)    |
| Some college                                                                        | 148 (39.3)      | 133 (38.8)   |
| College                                                                             | 109 (28.9)      | 97 (28.3)    |
| Graduate degree                                                                     | 71 (16.8)       | 55 (16.0)    |
| Comorbid illness, No. (%) <sup>c</sup>                                              |                 |              |
| Hypertension                                                                        | 254 (68)        | 239 (70)     |
| Obesity (BMI ≥ 30 kg/m <sup>2</sup> )                                               | 331 (88)        | 299 (87)     |
| Arthritis in other joints                                                           | 209 (55)        | 178 (52)     |
| Cardiovascular heart disease                                                        | 40 (11)         | 35 (10)      |
| Type II Diabetes                                                                    | 70 (19)         | 78 (23)      |
| Western Ontario and McMaster Universities Osteoarthritic Index (WOMAC) <sup>d</sup> |                 |              |
| WOMAC pain (range 0-20)                                                             | 7.4 (3.1)       | 7.4 (3.1)    |
|                                                                                     | 25.5 (11.5)     | 25.5 (11.4)  |

<sup>a</sup>Reported on a self-administered demographics questionnaire.

<sup>b</sup>Some variables had a small amount of missing data due to refusing to answer the question.

<sup>c</sup>Reported on a self-administered health history questionnaire as conditions diagnosed by a health care professional. With co-morbid illnesses that could exclude patient from participation, final approval/denial for participation provided after patient evaluation by study physician.

<sup>d</sup>The Western Ontario and McMaster Universities Osteoarthritis Index (WOMAC) consists of a self-administered questionnaire including 5 questions on pain, and 17 questions on physical function. Scale for each question ranges from 0 no symptoms to 4 extreme symptoms. Composite scores for pain ranged from 0-20 and for function 0-68. Pain cut points on a 0-20 scale are 2-8, mild, >8 -14, moderate, >14-20 severe (transformed from 0-10 scale reported in (23)).

eTable 2. Comparison baseline values (mean, SD) of completers and non-completers (no follow-up data). The non-completers were younger, heavier, and had more pain and worse function.

|                                    | <b>Completers</b>       | <b>Non-Completers</b>   | <b>P</b> |
|------------------------------------|-------------------------|-------------------------|----------|
| <b>Age (years)</b>                 | 65.0 (7.7)<br>N = 720   | 61.9 (7.6)<br>N = 103   | <.001    |
| <b>Weight (kg)</b>                 | 100.2 (20.8)<br>N = 720 | 105.8 (24.3)<br>N = 103 | .012     |
| <b>WOMAC Pain (range 0-20)</b>     | 7.4 (3.1)<br>N = 720    | 8.4 (3.7)<br>N = 103    | .003     |
| <b>WOMAC Function (range 0-68)</b> | 25.5 (11.5)<br>N = 720  | 29.0 (13.5)<br>N = 103  | .005     |

**eTable 3. Primary and prespecified secondary outcomes using site as a random effect.**

| <b>Outcome</b>                         | <b>Diet + Exercise</b>           | <b>Control</b>                   | <b>Mean difference (95% CI)</b> | <b><sup>a</sup>P value</b> |
|----------------------------------------|----------------------------------|----------------------------------|---------------------------------|----------------------------|
| <b>Primary Outcome</b>                 |                                  |                                  |                                 |                            |
| <b>WOMAC Pain (range, 0-20)</b>        |                                  |                                  |                                 |                            |
| Baseline mean (SD)                     | 7.4 (3.1)<br>(n = 377)           | 7.4 (3.1)<br>(n = 316)           |                                 |                            |
| 18-month adjusted means (95% CI)       | 5.0 (4.6 to 5.4)<br>(n = 329)    | 5.5 (5.1 to 5.9)<br>(n = 316)    | -0.6<br>(-1.0 to -0.1)          | .02                        |
| <b>Prespecified Secondary Outcomes</b> |                                  |                                  |                                 |                            |
| <b>WOMAC Function (range, 0-68)</b>    |                                  |                                  |                                 |                            |
| Baseline mean (SD)                     | 25.5 (11.5)<br>(n = 377)         | 25.5 (11.4)<br>(n = 343)         |                                 |                            |
| 18-month adjusted means (95% CI)       | 16.5 (15.3 to 17.7)<br>(n = 325) | 19.8 (18.6 to 21.0)<br>(n = 311) | -3.3<br>(-4.9 to -1.7)          | <.001                      |
| <b>6-minute walk distance (m)</b>      |                                  |                                  |                                 |                            |
| Baseline mean (SD)                     | 373 (90)<br>(n = 375)            | 371 (95)<br>(n = 341)            |                                 |                            |
| 18-month adjusted means (95% CI)       | 419 (411 to 428)<br>(n = 247)    | 376 (368 to 385)<br>(n = 219)    | 43<br>(31 to 54)                | <.001                      |
| <b>Pain medication use</b>             |                                  |                                  |                                 |                            |
| Baseline mean (SD)                     | 8.2 (5.0)<br>(n = 377)           | 8.4 (5.0)<br>(n = 343)           |                                 |                            |
| 18-month adjusted means (95% CI)       | 8.3 (7.9 to 8.8)<br>(n = 231)    | 8.3 (7.8 to 8.8)<br>(n = 228)    | 0.0<br>(-0.5 to 0.5)            | 0.90                       |
| <b>SF-36 Physical (range, 0-100)</b>   |                                  |                                  |                                 |                            |
| Baseline mean (SD)                     | 34.3 (9.2)<br>(n = 377)          | 35.9 (9.1)<br>(n = 343)          |                                 |                            |
| 18-month adjusted means (95% CI)       | 41.4 (40.2 to 42.6)<br>(n = 321) | 37.6 (36.3 to 38.8)<br>(n = 306) | 3.8<br>(2.5 to 5.2)             | <.001                      |
| <b>SF-36 Mental (range, 0-100)</b>     |                                  |                                  |                                 |                            |
| Baseline mean (SD)                     | 55.4 (9.8)<br>(n = 377)          | 55.0 (9.7)<br>(n = 343)          |                                 |                            |
| 18-month adjusted means (95% CI)       | 55.3 (54.3 to 56.2)<br>(n = 321) | 54.1 (53.1 to 55.0)<br>(n = 306) | 1.2<br>(-0.1 to 2.5)            | .07                        |

**eTable 4. Between-group differences at 18-month follow-up for primary and secondary outcomes using multiple imputation adjusted for baseline body mass index, sex, and baseline values. Weight and waist circumference were not adjusted for baseline body mass index.**

| <b>Outcome</b>           | <b>D+E vs Control<br/>(95% CI)</b> | <b>P-value</b> |
|--------------------------|------------------------------------|----------------|
| WOMAC Pain (0-20)        | -0.54 (-1.05, -0.04)               | .036           |
| WOMAC Function (0-68)    | -3.15 (-4.85, -1.45)               | .0003          |
| 6 Min Walk Distance (m)  | 42 (29, 55)                        | <.0001         |
| Weight (kg)              | -6.1 (-7.4, -4.8)                  | <.0001         |
| Waist circumference (cm) | -5.4 (-6.9, -3.8)                  | <.0001         |
| PASE (0-400)             | 22 (13, 31)                        | <.0001         |
| SF-36 Physical (0-100)   | 3.9 (2.5, 5.3)                     | <.0001         |

**eTable 5A. Adverse events (AEs) definitely related to the study by group assignment.**

| Event Description | No. Participants* | (%)** | Events*** | No. Participants* | (%)** | Events*** |
|-------------------|-------------------|-------|-----------|-------------------|-------|-----------|
| Body Injury       | 9                 | 2.17  | 9         | 1                 | 0.24  | 1         |
| Muscle Strain     | 6                 | 1.45  | 6         | 1                 | 0.24  | 1         |
| Leg/Knee Pain     | 6                 | 1.45  | 6         | 0                 | 0.00  | 0         |
| Trip/Fall         | 6                 | 1.45  | 6         | 0                 | 0.00  | 0         |
| Dizziness         | 2                 | 0.48  | 2         | 0                 | 0.00  | 0         |
| Chest Pain        | 1                 | 0.24  | 1         | 0                 | 0.00  | 0         |

\* -

number of participants experienced AE (participant is to be counted only once for each AE)

\*\* % of total number of participants enrolled

\*\*\* - number of events

There were 169 serious adverse events (70, diet and exercise; 99, attention control); none were definitely related to the study. There were 729 adverse events (428, diet and exercise; 301, attention control); 32 (4%) that were definitely related to the study, 10 body injury (9, diet and exercise; 1, attention control), 7 muscle strain (6, diet and exercise; 1, attention control), 6 leg/knee pain, (6 diet and exercise; 0, attention control), 6 trip/fall, (6 diet and exercise; 0, attention control), 2 dizziness, (2 diet and exercise; 0, attention control), 1 chest pain, (1 diet and exercise; 0, attention control).

**eTable 5B. Knee replacements and intra-articular knee injections by group assignment.**

| Event Description              | D&E               |       |           | Control           |       |           |
|--------------------------------|-------------------|-------|-----------|-------------------|-------|-----------|
|                                | No. Participants* | (%)** | Events*** | No. Participants* | (%)** | Events*** |
| Knee Replacement               | 19                | 4.59  | 21        | 23                | 5.62  | 23        |
| Intra-articular Knee Injection | 36                | 8.70  | 44        | 56                | 13.69 | 75        |

\* - number of participants experienced AE/SAE (participant is to be counted only once for each AE/SAE)

\*\* % of total number of participants enrolled

\*\*\* - number of events

**eTable 6. Comparison of 18-month outcomes with versus without participants (ppts) that were active during COVID**

| <b>Outcome</b>                       | <b>Diet + Exercise</b>           | <b>Control</b>                   | <b>Mean difference (95% CI)</b> | <b>P value</b> |
|--------------------------------------|----------------------------------|----------------------------------|---------------------------------|----------------|
| <b>WOMAC Pain</b>                    |                                  |                                  |                                 |                |
| 18-month with all ppts               | 5.0 (4.6 to 5.4)<br>(n = 329)    | 5.5 (5.1 to 5.9)<br>(n = 316)    | -.6 (-1.0 to -0.7)              | .02            |
| 18-month without COVID ppts          | 4.8 (4.5 to 5.2)<br>(n = 245)    | 5.6 (5.2 to 5.9)<br>(n = 252)    | -.8 (-1.3 to -.2)               | .005           |
| <b>WOMAC Function</b>                |                                  |                                  |                                 |                |
| 18-month with all ppts               | 16.5 (15.3 to 17.7)<br>(n = 325) | 19.8 (18.6 to 21.0)<br>(n = 311) | -3.3 (-4.9 to -1.7)             | <.001          |
| 18-month without COVID ppts          | 16.0 (14.6 to 17.3)<br>(n = 245) | 20.1 (18.8 to 21.4)<br>(n = 252) | -4.1 (-5.8 to -2.4)             | <.001          |
| <b>6-minute walk distance</b>        |                                  |                                  |                                 |                |
| 18-month with all ppts               | 419 (411 to 428)<br>(n = 247)    | 376 (368 to 385)<br>(n = 219)    | 43 (31 to 55)                   | <.001          |
| 18-month without COVID ppts          | 414 (405 to 422)<br>(n = 213)    | 374 (366 to 383)<br>(n = 209)    | 39 (28 to 51)                   | <.001          |
| <b>SF-36 Physical (range, 0-100)</b> |                                  |                                  |                                 |                |
| 18-month with all ppts               | 41.4 (40.2 to 42.6)<br>(n = 321) | 37.6 (36.3 to 38.8)<br>(n = 306) | 3.8 (2.5 to 5.2)                | <.001          |
| 18-month without COVID ppts          | 41.7 (40.6 to 42.8)<br>(n = 244) | 37.4 (36.3 to 38.5)<br>(n = 248) | 4.4 (2.9 to 5.8)                | <.001          |
| <b>SF-36 Mental (range, 0-100)</b>   |                                  |                                  |                                 |                |
| 18-month with all ppts               | 55.3 (54.3 to 56.2)<br>(n = 321) | 54.1 (53.1 to 55.0)<br>(n = 306) | 1.2 (-0.1 to 2.5)               | .07            |
| 18-month without COVID ppts          | 55.1 (54.1 to 56.2)<br>(n = 244) | 53.9 (52.8 to 55.0)<br>(n = 248) | 1.2 (-0.2 to 2.6)               | .10            |



| eTable 7. Number and percent of meal replacement use for the diet + exercise and control groups. |                 |      |         |      |
|--------------------------------------------------------------------------------------------------|-----------------|------|---------|------|
|                                                                                                  | Diet + Exercise |      | Control |      |
|                                                                                                  | N               | %    | N       | %    |
| 6 month follow up                                                                                |                 |      |         |      |
| <sup>a</sup> Less than 1x/week                                                                   | 83              | 26.7 | 227     | 82.5 |
| <sup>b</sup> 1x or more/week                                                                     | 228             | 73.3 | 48      | 17.5 |
| 5-7x/week                                                                                        | 113             | 36.3 | 22      | 8.0  |
| 12 month follow up                                                                               |                 |      |         |      |
| Less than 1x/week                                                                                | 101             | 38.8 | 196     | 85.6 |
| 1x or more /week                                                                                 | 159             | 61.2 | 33      | 14.4 |
| 5-7x/week                                                                                        | 75              | 28.8 | 15      | 6.5  |
| 18 month follow up                                                                               |                 |      |         |      |
| Less than 1x/week                                                                                | 148             | 51.6 | 202     | 80.5 |
| 1x or more /week                                                                                 | 139             | 48.4 | 49      | 19.5 |
| 5-7x/week                                                                                        | 75              | 26.1 | 19      | 6.6  |
| <sup>a</sup> Includes patients in the never, 1x/month, 2-3 x/month categories.                   |                 |      |         |      |
| <sup>b</sup> Includes patients in the 5-7x/week category.                                        |                 |      |         |      |

**eFigure 1. Mean (95%CI) Unadjusted Body Weight at Baseline and 6 and 18-month Follow-up for Patients for Whom Follow-up Data Were Available.**

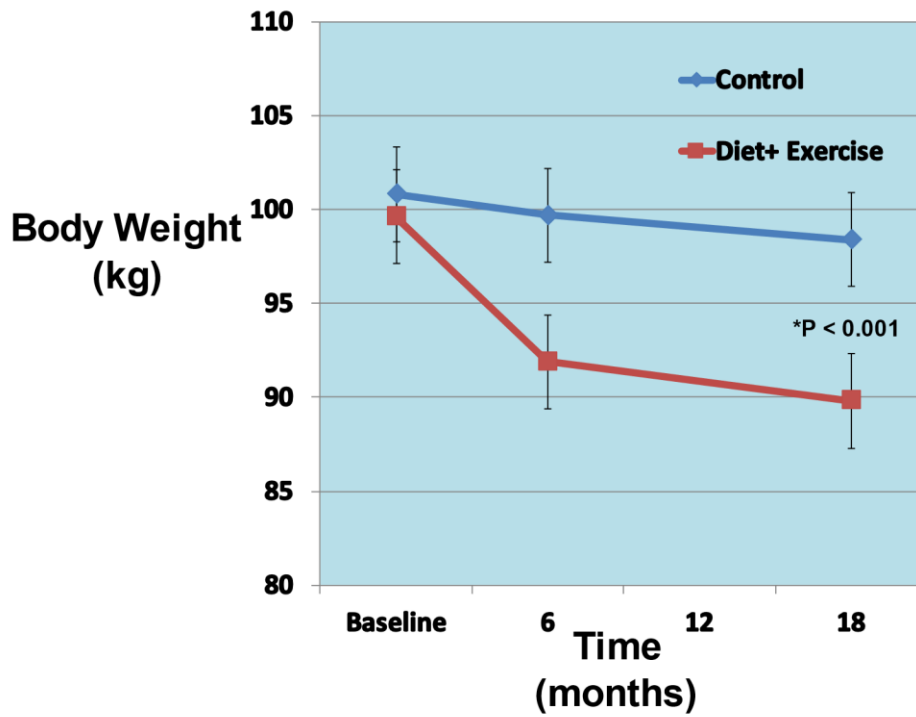

**eFigure 2. Change in Weight vs Change in WOMAC Pain for the Diet and Exercise Group**

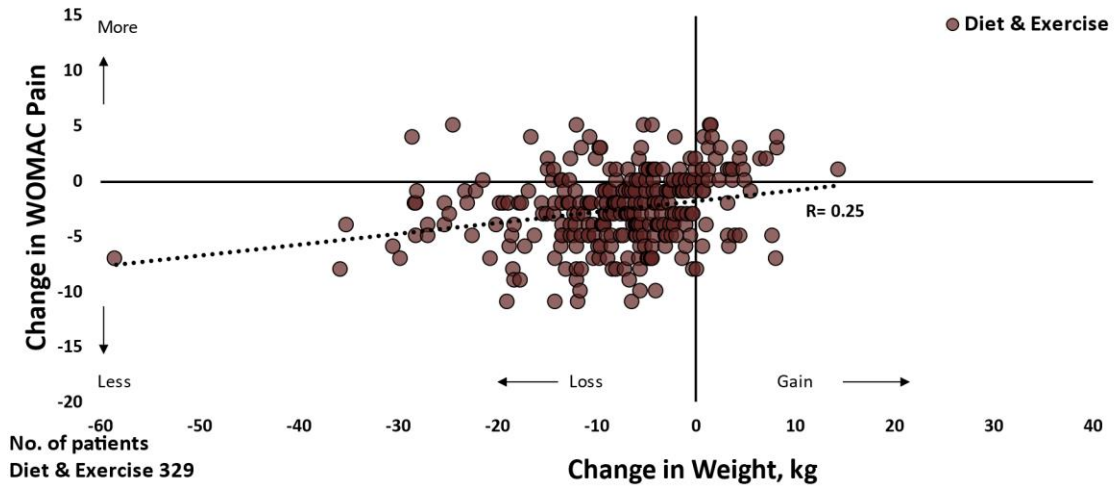

**eFigure 3. Change in Weight vs Change in WOMAC Pain for the Control Group**

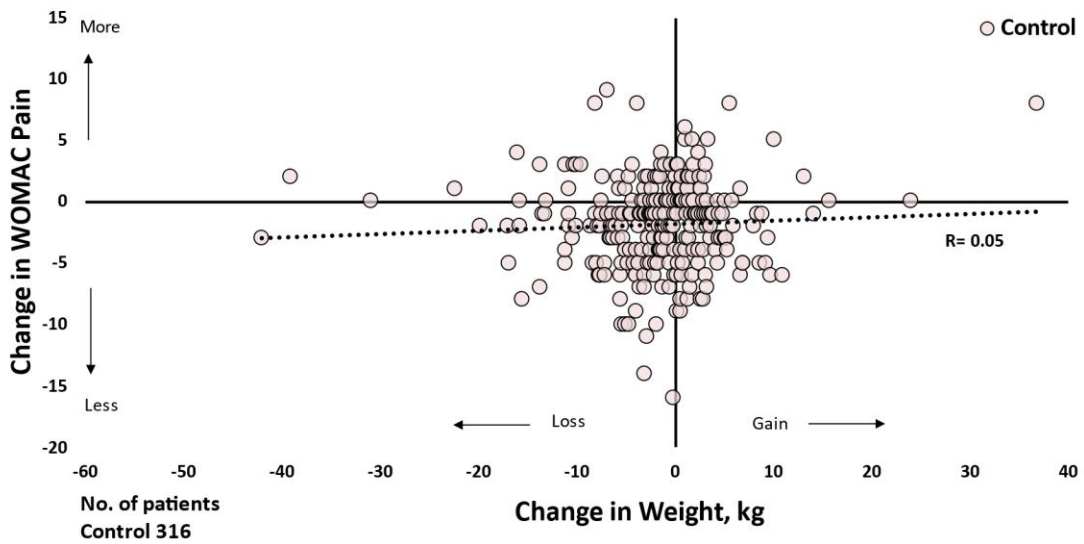

Supplement: jama-e2221893-s002.pdf [file jama-e2221893-s002.pdf]
