# Supplementary material
Source: PubMed Central journal article supplement (PMC9856237)
Supplement: jama-e2221893-s001.pdf [file jama-e2221893-s001.pdf]

**Protocol Documents**

Original Study Protocol .....2

Final Protocol With Amendments .....15

Clinical Protocol Synopsis.....30

Statistical Analysis Plan.....44

## Study Protocol

Weight loss and Exercise for Communities with Arthritis in North Carolina (WE-CAN)

7/15/2015

### Principal Investigator

Stephen P. Messier, PhD

### Co- Principal Investigator

Joanne Jordan, MD, MPH

### Site Principal Investigators

Dan Beavers, PhD, Leigh Callahan, PhD, Stephen P. Messier, PhD, Kate Queen, MD

### Co-investigators

Richard Loeser Jr., MD, Shannon Mihalko, PhD, Gary Miller, R.D. PhD, Jeffery Katz, MD, MSc, Elena Losina, PhD, MSc, Sara Quandt, PhD

### Consultants

Paul DeVita, PhD, David Hunter, MD

### Project Description:

The global prevalence of knee osteoarthritis (OA) is estimated at greater than 250 million persons or 3.6% of the world population, ranking 23<sup>rd</sup> on the list of the most common sequelae. Knee OA is the most prevalent cause of mobility dependency and disability, with the time spent living with symptoms averaging 26 years. More than two-thirds of Americans age  $\geq 20$  years are overweight or obese. Two in three people who are obese will develop symptomatic knee OA in their lifetime. In addition to the strong relationship between obesity and knee OA, a recent systematic review found no healthy consequences of overweight/obesity, even in individuals who are metabolically healthy.

In 2004 we reported that a 5% weight loss, when combined with exercise, resulted in a 30% decrease in pain and a 24% improvement in function. Our recently completed trial entitled Intensive Diet and Exercise for Arthritis (IDEA) sought to improve on our work with a more intensive weight loss intervention, 2 to 3 times the weight loss we had recently achieved. IDEA compared intensive diet (D) and exercise (E) interventions, separately and in combination, across an 18-month intervention period in 454 overweight and obese older adults with radiographic knee OA. An intent-to-treat analysis revealed that after 18 months the D+E group reduced pain by 51% compared to 25% and 28% for the D only and E only groups, respectively. The D+E group was also superior to the E group on self-reported physical function, health related quality of life, and walking speed, and had significantly lower knee joint loading and serum levels of IL-6, a pro-inflammatory cytokine. On average, our D+E intervention was twice as effective at relieving pain as previous long-term OA trials. We concluded that wider adoption of intensive weight loss with a goal of at least 10% of baseline body weight combined with exercise could reduce the burden of disability related to knee OA.

IDEA was an efficacy study with impressive results, a trial designed to determine the effects of intensive diet and exercise *under ideal circumstances*. However, a common concern from physicians who treat people with knee OA is lack of practical means to implement this treatment in the clinical environment. Indeed, there is no evidence regarding how this efficacious intervention could be successfully adapted to be effective in real world clinical and community settings and also be cost effective.

We plan to conduct the first long-term (18 months) pragmatic (i.e., effectiveness) trial of intensive diet and exercise in older adults with knee OA under more usual conditions in both rural and urban communities across

North Carolina. Participants (age  $\geq 50$  years; BMI  $\geq 27$  kg/m<sup>2</sup>) will be randomized to one of 2 groups: diet-induced weight loss and exercise or an attention control group. The sample will consist of 820 ambulatory, community-dwelling persons that meet the ACR clinical criteria for knee osteoarthritis. The primary aim is to compare the intervention effects on knee pain. Secondary aims will compare the intervention effects on self-reported function, mobility, health related quality of life, and the cost effectiveness and budgetary impact of the intervention.

This program will deliver state-of-the-art weight-management techniques using procedures that are new to this area of research in a community setting. Our proposed study is innovative in at least 6 important ways.

1. ***The first long-term trial of diet-induced weight loss and exercise in adults with knee OA delivered in a practical, less rigorously monitored, community setting.*** We will design and implement this intervention to make it cost-effective and to serve as a blueprint for diverse communities nationwide. If successful, the results can inform healthcare payers about the first non-pharmacologic treatment of proven benefit for overweight and obese adults with knee OA that also promises to decrease medical care costs.
2. ***The first pragmatic behavioral health trial targeting rural and urban sites.*** Few pragmatic trials have focused on rural populations (Fortney et al; Gooch et al; Schmidt et al), and none was designed to affect behavior change using community health interventionists. About 25% of the US population lives in diverse rural communities. Most have fewer services and resources than urban communities (US Dept. of Agr). They report poorer health-related quality of life (National Rural Health Assoc.), reflecting higher prevalence of many disorders, including OA. Tailoring a non-pharmacologic intervention for communities with limited healthcare access would be a breakthrough for public health (National Rural Health Assoc.).
3. ***The first evidence that this non-pharmacologic intervention can be implemented cost-effectively in US communities.*** Successful results will lead to step-by-step guidelines regarding the selection of community intervention sites, ways to engage the medical community, and how to deliver a weight-loss and exercise intervention. In addition to the well-established association between obesity and knee OA, strong relationships exist between high BMI/obesity and coronary heart disease, type 2 diabetes, high blood pressure, stroke, dyslipidemia, and certain types of cancer (Bhaskaran et al; Campbell ). This trial will provide a model for community leaders to develop and execute an effective diet and exercise program at a reasonable cost that will engage local physicians and healthcare providers who treat knee OA, obesity, and related comorbidities.
4. ***A practical treatment option for physicians who treat the comorbidities associated with high BMI.*** Both the CDC and the American Cancer Society have strategic initiatives that encourage community-based interventions to effectively reduce overweight and obesity (Bauer et al; Campbell).
5. ***Focus on implementation and scalability of treatment approaches.*** The innovative features of the proposed study will bridge short-term efficacy and long-term outcomes. Identifying and applying the factors critical for intervention sustainability ensure translation from research to practice.
6. ***Formal assessment of cost-effectiveness and Budget Impact Analysis.*** Although rarely performed in pragmatic trials, we will formally assess the cost-effectiveness of the implemented strategies. Results will allow clinicians and policymakers to assess the feasibility of community-based implementation

The proposed study is uniquely designed to identify a practical, effective, non-pharmacologic therapy capable of reducing knee pain and improving function and quality of life in rural and urban communities of older, overweight and obese adults with knee OA.

### **Primary Hypothesis and Aim**

**Hypothesis 1.** A pragmatic, community-based, diet-induced weight-loss and exercise intervention will significantly reduce knee pain among overweight and obese adults aged  $\geq 50$  years with knee OA compared to an attention-control group.

**Aim 1.** To determine whether a pragmatic, community-based, 18-month diet-induced weight-loss and exercise intervention implemented in three North Carolina counties with diverse residential (from urban to rural) and socioeconomic composition significantly decreases knee pain [as measured by the Western Ontario McMasters Universities Osteoarthritis Index (WOMAC) pain subscale] in overweight and obese adults with knee OA compared to an attention-control group.

### **Secondary Hypotheses and Aims**

**Hypothesis 2.** A pragmatic, community-based, diet-induced weight-loss and exercise intervention will significantly improve self-reported function, health-related quality of life, and mobility among overweight and obese adults aged  $\geq 50$  years with knee OA compared to an attention-control group.

**Aim 2.** To determine whether a pragmatic, community-based, 18-month, diet-induced weight-loss and exercise intervention improves WOMAC self-reported function, health-related quality of life as measured by the physical subscale of the SF-36 questionnaire and 6-minute walk distance (an accepted measure of mobility) in overweight and obese adults with knee OA compared to an attention control group.

**Hypothesis 3.** A pragmatic, community-based, diet-induced weight-loss and exercise intervention will be a cost-effective addition to treatment modalities in overweight and obese persons with knee OA.

**Aim 3.** To establish the cost-effectiveness of this pragmatic, community-based, multimodal diet-induced weight-loss and exercise program by conducting cost-effectiveness and budgetary impact analyses using data from the current trial in a validated computer-simulated model of knee OA.

### **Study Design**

We will randomize 820 overweight and obese ( $BMI \geq 27 \text{ kg/m}^2$ ), adults age  $\geq 50$  yrs knee OA into one of 2 groups: an intensive dietary restriction-plus-exercise (D+E) group or an attention control group. Forsyth, Johnston, and Haywood Counties' recruitment goals are 450, 220, and 150, respectively. Our minimum weight-loss goal for the weight-loss group will be 10% of body weight. The exercise intervention will meet 2 days/wk at the clinical site and will exercise 1 day/wk at home or other location of their choice. The intervention will be comprised of both aerobic and strength training exercises. The healthy lifestyle group will meet 4 times over an 18 month period and receive a combination of webinars, emails, and mailings for the remaining months.

### **Primary Endpoint**

Western Ontario McMasters Universities Osteoarthritis Index (WOMAC). We will measure self-reported physical function and pain using the WOMAC. The LK version asks participants to indicate on a scale from 0 (none) to 4 (extreme) the degree of difficulty experienced in the last 48 hours due to knee OA. Individual scores for the 17 items are totaled to generate a summary score that could range from 0-68, with higher scores indicating poorer function. The pain index assesses participants' pain on the same scale, ranging from 0 (none) to 4 (extreme). The pain subscale consists of 5 items and total scores can range from 0-20, with larger scores indicating greater dysfunction. This instrument has been validated and recommended by the Osteoarthritis Research Society as the health status measure of choice in older adults with knee OA.

### **Secondary Endpoint**

Mobility. Our primary mobility measure will be 6-minute walk distance. Participants are told to walk as far as possible in 6 minutes on an established course. No personal timing devices are permitted, and participants are not provided feedback during the test. Results are significantly correlated to treadmill time and symptom-limited maximal oxygen consumption ( $r = 0.52$  and  $r = 0.53$ , respectively) and have a 3-month test-retest reliability of 0.86 (Pennix et al). The Short Physical Performance Battery (SPPB) will also be used to measure mobility (Guralnik et al). The SPPB is comprised of the following tests (balance, walking speed, and chair rise).

Cost Effectiveness Resource utilization will be collected by questionnaire, with domains including visits to

175 clinicians (physicians, nurses, physical therapists, others), tests, medications, injections, surgery, alternative  
 176 therapies. The Work Productivity and Activity Impairment index (WPAI) will be used to assess absenteeism  
 177 and reduced productivity while at work (presenteeism).  
 178

179 Body weight, height, hip/waist circumference, BMI. Body weight and height will be obtained using standard  
 180 techniques. Only persons with a BMI  $\geq 27$  kg/m<sup>2</sup> will be eligible.  
 181

182 Medical History and Medications. Participants will be given forms to assess medical history and presence of  
 183 comorbidities. Participants will also be asked questions about their medical history during the phone screen  
 184 so as to reduce participant burden by identifying potential exclusion criteria. Participants will be administered  
 185 a medication questionnaire adapted from the ARIC study and widely used in field research and in our prior  
 186 studies at each testing visit (ARIC).  
 187

188 It is designed to obtain information about all prescription and over-the-counter medicines and supplements  
 189 used during the 2 weeks prior to the interview (home or clinic). The participants will be mailed the medication  
 190 form to fill out at home and will return the form to the interviewer. Participants may also be asked to provide  
 191 the interviewer with all medicine containers so that the interviewer can transcribe the information. In addition  
 192 participants will be encouraged to notify the study staff of any medication changes during the course of the  
 193 study.  
 194

195 In addition to the medical history and medication questionnaires, participants will also be given a risk  
 196 stratification questionnaire at the first screening visit. The purpose of this questionnaire is to divide participants  
 197 into 3 levels of cardiovascular risk: low, moderate, and high. Risk stratification is based in the  
 198 presence/absence of cardiovascular disease risk factors, sign and symptoms, and known medical history. The  
 199 American College of Sports Medicine recommends that patients who are at moderate risk receive medical  
 200 clearance if they are to begin a vigorous exercise program but that medical clearance is not needed for  
 201 moderate intensity exercises (Pescatello et al., 2014). We have made a slight adjustment to the protocol so  
 202 that all participant exercise falls within this moderate intensity range. Specifically, the original protocol called  
 203 for participants to exercise in the range of 50-75% of their maximal heart rate reserve (i.e., moderate to high  
 204 intensity). This range has been modified to 40-60% of maximal heart rate reserve (i.e., moderate intensity).  
 205 Hence, participants that fall into the low and moderate risk category will be allowed entry into the study without  
 206 the need for physician clearance. *Those who fall within the high risk category will require medical clearance*  
 207 *from their physician.* Final approval and acceptance into the program for high risk patients will be provided by  
 208 our study physician. It's worth noting the risk of serious adverse events occurring during properly supervised  
 209 exercise is extremely low (< 1 per 100,000 hours of exercise) even in older adults, with cardiovascular disease.  
 210

211 Measures of Quality of Life. The SF-36 is the most widely used and carefully validated measure of health  
 212 related quality of life and will be used to yield 2 broad summary scores: physical health and mental health  
 213 (Ware and Sherbourne). The Eurqol Quality of Life will also be used to measure quality of life. The Adherence  
 214 Self Efficacy questionnaire is designed to assess beliefs in one's ability (confidence) to continue exercising at  
 215 various intensities and frequencies. The FAST-23 will be used to measure physical disability.  
 216

217 Dietary Intake. National Cancer Institute Modified Health Habits and History Questionnaire (HHHQ) provides  
 218 nutrient assessment of dietary intake.\_  
 219

220 Physical Activity. The Physical Activity Scale for the Elderly (PASE) has proven reliable in many of our  
 221 clinical trials, including a group of 254 men and women aged  $\geq 65$  yrs (Washburn et al).  
 222

223 Cognitive Functioning. The MOCA will be used to measure cognitive function (Nasreddine et al).  
 224

### 225 Inclusion/Exclusion Criteria

226 *Inclusion Criteria:*

- 227 (1) Age  $\geq 50$  years  
 228

229 (2) Knee Pain plus ACR Criteria for Knee Osteoarthritis  
230

231 (3) BMI =  $27 \geq \text{kg/m}^2$   
232

233 *Exclusion Criteria:*

- 234 1. Significant co-morbid disease that would threaten safety or impair ability to participate in interventions  
235 or testing (Method: Medical history; medications; physical exam; telephone pre-screen; risk  
236 stratification)
- 237 a. Blindness
  - 238 b. Type 1 diabetes
  - 239 c. Other type of arthritis (rheumatoid, psoriatic, fibromyalgia, etc.)
  - 240 d. History or symptoms of coronary artery disease or pulmonary disease with no medical  
241 clearance (symptoms include angina, unreasonable breathlessness,  
242 dizziness/fainting/blackouts)
  - 243 e. Unable to walk without a device
- 244 2. Not sufficiently overweight or obese, BMI <  $27 \text{ kg/m}^2$  (Method: Ht/Wt)
- 245 3. Not having knee pain: (Method:  $\leq 4$  on the pain scale, WOMAC and Telephone Screen)
- 246 4. Inability to finish 18-month study or unlikely to be compliant (Method: Telephone Screen, Screening  
247 Interviews)
- 248 a. Planning to leave area > 2 month during the next 18 months
  - 249 b. Unwilling to change eating or physical activity habits
  - 250 c. Unwilling to attend exercise/diet sessions
- 251 5. Age, age < 50 (Method: Telephone Screen & Demographics Forms)
- 252 6. Other conditions that may prohibit the effective delivery of the intervention (Method: Telephone Screen)
- 253 a. Unable to provide own transportation to exercise center
  - 254 b. Unable to read or write, cannot speak or read English
- 255

## 256 Randomization Procedures

257  
258 We propose a stratified block randomization with block size unknown to investigators and staff will ensure  
259 equal accrual to each study arm. Prestratification will balance pretrial BMI values (27.0-34.9 kg/m<sup>2</sup>, 35.0-44.9  
260 kg/m<sup>2</sup>, ≥45 kg/m<sup>2</sup>) and gender, which could predict intervention effect and associations between secondary  
261 outcome variables. We will also use county as a fixed effect for randomization. A computer program will  
262 randomize participants into the 2 groups, verify eligibility, and provide identification number and intervention  
263 assignment. This system worked very successfully in the IDEA study.  
264

## 265 Interventions

### 266 Diet-induced weight loss plus exercise

#### 267 *Months 0 -6*

268 There will be two individual sessions per month and 2 group sessions per month for the first 6 months.  
269 The behavioral sessions will focus on awareness of changing eating habits to lower caloric intake.  
270 Educational content information regarding what food changes to make, how to make them, and why  
271 they are important will be clearly explained and discussed with participants and significant others.  
272 Each group session will include problem solving, review of a specific food topic, and tasting of several  
273 well-balanced, low-fat, nutritious foods prepared with widely available ingredients. During the  
274 individual sessions, the counselor will review individual progress, solve problems, answer questions,  
275 and set goals. During the initial individual session, the nutrition counselor will give the participant a  
276 weight history background questionnaire. The major emphasis for Period 1 is to enhance participant  
277 awareness of the importance and the need to change eating habits, i.e. lower caloric intake for weight  
278 loss. Each participant should be given the opportunity to practice skills using goal setting in a  
279 stepwise approach. Participants will follow a weekly menu plan which will incorporate meal  
280 replacements into their diet plan. Lean Shakes, a General Nutrition Center (GNC), product will be the  
281 meal replacement used. Participants may replace the Lean Shakes with a healthy, low-calorie meal  
282 of their choice, such as Lean Cuisine. Motivation and encouragement through the combined efforts of  
283 the nutrition counselor, the participant, significant others and the nutrition staff will enhance  
284 adherence.

#### 285 *Months 7-12*

286 In period 2 participants will focus on continued weight loss to reach the study weight loss goal of 10%  
287 of baseline weight. Participants will attend one group and one individual session per month. Once the  
288 weight loss goal is achieved an individual may either begin weight maintenance, or they may continue  
289 to lose additional weight using safe and healthy nutrition practices. Participants will follow a weekly  
290 menu plan with recipes using traditional foods and the option to incorporate meal replacements. The  
291 traditional meals will contain 400-600 kcals, be low in fat and added sugars, and high in vegetables,  
292 fruits, and whole grains. Snacks may be a bar, fruit, or vegetable providing ~100-120 kcals. Daily  
293 caloric intake for each participant will be adjusted to his or her rate of weight change. Each group will  
294 be encouraged to take a daily multivitamin/mineral supplement containing no more than 100% of the  
295 Dietary Reference Intake for any particular nutrient. As fewer meal replacements are consumed,  
296 intervention staff will assist in developing meal plans to provide the prescribed macronutrient-  
297 balanced energy intake.

#### 298 *Months 13-18*

299 Period 3 will emphasize weight management over time, with 1 monthly group contact. Weight loss can  
300 continue throughout the intervention, provided the participant wants to and has not reached a level  
301 associated with health hazards; i.e. a 20% body weight loss at 6 months or >30% at 12 months.  
302 Participants will continue to follow a weekly menu plan with recipes using traditional foods and the  
303 option to incorporate meal replacements.  
304

The exercise intervention will cover an 18-month period. The exercise program will consist of a 15-minute aerobic phase, a 20-minute strength-training phase, a second 15-minute aerobic phase, and a 10-minute cool-down phase. These sixty-minute exercise sessions will be conducted three days per week (two days/week will be center based). Each participant will be prescribed an individual walking prescription by the exercise leader, which will be adjusted accordingly, as each participant progresses throughout the 18 months. The exercise will be of moderate intensity. Alternate forms of aerobic exercise, such as but not limited to stationary bike, elliptical trainer, or treadmill walking, can be used in place of over-ground walking. This choice could be based on participant preference, the limitations of the exercise facility, or the participant's pain level.

Intervention Locations: *Forsyth County*: The diet and exercise classes will be offered at a number of sites within Winston-Salem. Participants will be allowed to pick the location that is most convenient for them to attend. Classes will take place at the Clinical Research Center on the Wake Forest University Campus, at St. Peter's World Outreach Center, and at Smiley's Fitness. *Haywood County*: The diet and exercise classes will be held at the Midwest Health & Fitness Center in Waynesville, NC. *Johnston County*: The diet and exercise classes will be held at the Clayton Community Center and the Johnston Medical Mall.

All intervention staff in the WE-CAN study will be CPR certified. The exercise coordinator, who is part of the coordinating center and is responsible for maintaining exercise protocol congruity between the intervention sites, will train and supervise the intervention staff. Intervention staff will meet monthly with the exercise coordinator to discuss any potential problems, risks, and concerns that have risen. AEDs will be available at each location. Emergency drills will be performed monthly in addition the AED will be checked monthly. The clinical research center (Forsyth), Johnston Medical Mall (Johnston), and the Midwest Health and Fitness Center (Haywood) also house cardiac rehabilitee programs and will also have crash carts available.

#### Attention Control Intervention

The attention control intervention will cover an 18-month period. There will be four total face to face group meetings over the 18 months, with one meeting each at months 1, 6, 12, and 18; and during the other months (months 2-5, 7-11, 13-17) participants will receive a combination of informational packets, webinars, and emails. Each group meeting will last approximately one hour and will be held at Senior Services in Winston-Salem, NC. The sessions will be interactive and will provide useful information on such topics as proper foot care, general nutrition, management of medications, and sleep practices. The Community Advisory Board will give input on the class sessions. The final component of the workshop, the upper body stretching component, was chosen to be part of the control arm to enhance adherence to this arm of the study. Specifically, this "placebo exercise" activity will serve to increase the benefit perceived by the participants without directly affecting the study outcomes. Hand-outs for upper body stretching at home will be provided. Prior studies of middle aged to older adults suggest that participants will be less likely to participate if they think that any of the treatment groups will not provide personal benefit. These stretching exercises will be restricted to the upper body and have not been shown to have an influence on the primary study outcomes.

For the other months, experts across a broad range of relevant topics that are of interest to older adults will provide information via information packets, webinars or emails. These monthly contacts and email blasts will keep the participants in the attention control group engaged in the WE-CAN study and will increase adherence to the group sessions and the testing visits.

#### Procedures-Screening and Follow-up Visits.

| Measurements                | PSV | SV1 | FU6 | FU12 | FU18 | Explanation                                       |
|-----------------------------|-----|-----|-----|------|------|---------------------------------------------------|
| <b>Questionnaires</b>       |     |     |     |      |      |                                                   |
| Informed Consent            |     | x   |     |      |      |                                                   |
| Eligibility Questionnaire   | x   |     |     |      |      | To determine eligibility                          |
| Medical History             | xc  | x   | x   | x    | x    | For eligibility and to document changes in health |
| Comorbidities Questionnaire |     | x   | x   | x    | x    |                                                   |
| ACSM Risk Stratification    | xc  | x   |     |      |      | For eligibility                                   |



|                                                                                                   |    |   |   |   |   |                                                                                      |
|---------------------------------------------------------------------------------------------------|----|---|---|---|---|--------------------------------------------------------------------------------------|
| Randomization                                                                                     |    | x |   |   |   |                                                                                      |
| WOMAC                                                                                             |    | x | x | x | x | Pain is primary and function secondary outcomes                                      |
| Cost Effectiveness                                                                                |    | x | x | x | x |                                                                                      |
| PASE scale                                                                                        |    | x | x | x | x | Physical Activity Scale for the Elderly                                              |
| MOCA                                                                                              |    | x |   |   | x | Montreal Cognitive Assessment                                                        |
| EuroQol Quality of Life(EQ5D)                                                                     |    | x | x | x | x | Quality of life measure                                                              |
| Work History Resource                                                                             |    | x | x | x | x | Visits to clinicians, tests, medications, injections, surgery, alternative therapies |
| Work Productivity and Activity Impairment Index                                                   |    | x | x | x | x | assesses absenteeism and presenteeism                                                |
| DHQ II                                                                                            |    | x | x | x | x | NIH Diet History Questionnaire                                                       |
| SF-36                                                                                             |    | x | x | x | x | Health related quality of life (physical, mental)                                    |
| Self-Efficacy-Adherence                                                                           |    | x | x | x | x | Belief can exercise at various intensities                                           |
| Demographics                                                                                      |    | x |   |   |   |                                                                                      |
| Medication form                                                                                   |    | x | x | x | x | Atherosclerosis Risk in Communities form                                             |
| Adverse Events                                                                                    |    |   | x | x | x | Also collected as they occur                                                         |
| <b>Physical Performance Tests/Knee Exam</b>                                                       |    |   |   |   |   |                                                                                      |
| height                                                                                            | xc | x |   |   |   | To determine BMI                                                                     |
| weight                                                                                            | xc | x | x | x | x | To determine BMI                                                                     |
| Knee exam                                                                                         |    | x |   |   |   | To determine eligibility                                                             |
| 6 minute walk                                                                                     |    | x | x | x | x | Measure of mobility                                                                  |
| Short Physical Performance Battery (SPPB)                                                         |    | x | x | x | x | Gait speed, sit to stand, balance tests; predicts disability                         |
| Functional Leg Strength                                                                           |    | x | x | x | x | Sit to stand test, part of SPPB                                                      |
| xc = brief screen by self-report, PSV = Prescreening Visit. SV = screening visit. FU = follow-up. |    |   |   |   |   |                                                                                      |

### Procedures-Screening and Follow-up Visits.

Prescreening visit (PSV). Individuals who contact our recruitment office in response to advertising will be asked a series of brief questions that focus on major eligibility criteria. A screening visit appointment will be made for participants who meet major eligibility criteria. A medical history form and a medication form will be mailed to the participants for them to complete.

d.5.Screening Visit One (SV1) Individuals will come to Reynolds Gymnasium on the campus at Wake Forest University. SV1 includes an explanation of the study and obtaining informed consent. Other assessments include medical history and medication use (previously mailed), cardiovascular risk, height and weight (to calculate BMI), and a knee exam. The MOCA will be administered. The following questionnaires will be given: demographics, cost effectiveness questionnaires, WOMAC, Physical Activity Scale for the Elderly (PASE), Health-Related Quality of Life (HRQL), dietary intake questionnaires, and efficacy measures. At the end of the visit the SPPB and 6 minute walk will be performed. This screening visit will last approximately 1.5-2 hours.

6-month Follow-up Data Collection Visit (FU6): Participants will return to Reynolds Gym to repeat all measures collected at baseline (minus the MOCA and demographics). The testing session will last approximately 1.5 – 2 hours.

12-month Follow-up Data Collection Visit (FU12): Participants will return to Reynolds Gym to repeat all measures collected at baseline (minus the MOCA and demographics). The testing session will last approximately 1.5 – 2 hours.

18-month Follow-up Data Collection Visit (FU18): Participants will return to Reynolds Gym to repeat all measures collected at baseline (minus the demographics). The testing session will last approximately 1.5 – 2 hours.

### **Safety Monitoring Plan**

A safety committee has been established to monitor participant safety and to evaluate the progress of the study.

Adverse Event and Serious Adverse Event Collection and Reporting

Adverse Event (AE) - An AE is any unfavorable and unintended diagnosis, sign (including an abnormal

laboratory finding), symptom, or disease temporarily associated with the study intervention, which may or may not be related to the intervention, including excessive delayed onset muscle soreness (DOMS) as some minimal muscle soreness will be expected after the training session. AEs include any new events not present during the pre-intervention period or events that were present during the pre-intervention period which has increased in severity. Participants will be asked if any events have occurred prior to each intervention class and testing session.

Study staff will report non-serious adverse events (related and unrelated to the study) to site project manager and principal investigator within 7 days of notification of the event and will be reported to the coordinating center quarterly. Testing staff will inquire about adverse events prior to testing to ensure there are no unreported events. The site physician/PA will review non serious adverse events (AE) on a weekly basis. Non serious adverse events will be included in the NIAMS safety report and submitted bi-annually.

Serious Adverse Event (SAE) - An SAE is any untoward medical occurrence that results in death, is life-threatening, requires or prolongs hospitalization, causes persistent or significant disability/incapacity, results in congenital anomalies/birth defects, or, in the opinion of the investigators, represents other significant hazards or potentially serious harm to research participants or others.

Staff will report serious adverse events (related and unrelated to the intervention) to the site project manager and principal investigator within 24 hours of notification. Serious adverse events (SAEs) will also be reported to the site physician/PA within 24 hrs of study notification. SAEs will be reported to the coordinating center within 24 hrs of notification of the site PI. SAEs will be reported to NIAMS within 24 hours of being reported to the PI. The WFU IRB does not require the reporting of adverse events unless it is serious, unexpected and related to the study. Follow-up information will be provided to the PI, DSMB/Safety Officer, and IRB, as appropriate.

NIAMS will assign a Data Safety Monitoring Board (DSMB) or safety monitor to monitor all aspects of the study.

The DSMB/Safety Monitor will have the following charges:

- To review the entire study protocol, the operations manual, and the informed consent and assent forms for recruitment, randomization, intervention, participant safety, data management, auditing plans for participant records, and quality control and analysis plans, and to identify needed modifications.
- To review data related to efficacy, recruitment, randomization, compliance, retention, protocol adherence, trial operating procedures, forms completion, intervention effects, gender and minority inclusion, and participant safety over the course of the trial.
- To identify problems related to safety over the course of the study and to report them in writing to the PIs, who will ensure that the appropriate individuals receive the report.
- To identify a need for additional data relevant to safety and to request them from investigators.
- To propose appropriate analyses and periodically review developing data on safety and endpoints.
- To make recommendations regarding recruitment, intervention effects, retention, compliance, safety, and continuation of the study.
- To send the Program Administrator and PIs written reports following each DSMB meeting, addressing all issues raised, and subsequently sent to the IRB.
- At any time, the DSMB may recommend discontinuation of any component/intervention of the study for any of the following reasons:
  - 1) Compelling evidence from this or any other study of an adverse effect sufficient to override any potential benefit of the interventions to the target population.
  - 2) Compelling evidence from this or any other study of a significant beneficial effect whose continued denial to other study group(s) would be unethical.
  - 3) A very low probability of addressing the study hypothesis within a feasible time frame.

### **Statistical Considerations**

#### Data Management

The Data Management Group, part of the Coordinating Center, has primary responsibility for randomization

and analyzing data generated by the clinical centers. Data will be collected on hard-copy forms at each site and transformed to an electronic database. Our web-based management system will assure integrity and validity. Dynamic reports and periodic statistical analyses will monitor quality. A participant-based inventory system will track recruitment, retention, adherence, and missing data from entry through exit, close-out, and lock-down of final datasets. Our team developed a similar database for the IDEA and START studies.

### Statistical Analyses

Statistical analyses will be conducted according to intention-to-treat principles using SAS.

#### Primary Aim.

The primary hypothesis of long-term reduced WOMAC pain at 18 months will be tested based on a two-tailed significance level of 0.05 using contrast statements from a repeated measures mixed linear model with time (6, 18 mos), randomization arm (D+E vs control), and the interaction, which adjusts the means at each time point for potential missing data bias (Laird and Ware). Intervention-effect estimates will be further adjusted for baseline pain values, BMI, county, and gender; analysis will match design, so the variance estimate will not be biased. Participant ID number will be included as a random effect to control for within-subject variability, and the longitudinal model will use an unstructured covariance matrix. In the unlikely event the model does not converge, a first-order autoregressive (AR[1]) covariance structure will be fit instead. Maximum-likelihood techniques will estimate parameters, as in the IDEA trial (Messier et al). Preliminary analyses will be conducted to check the shape of the distributions and variances between groups and as a function of the covariates. Regression diagnostics and residual plots will help to find appropriate transformations, if necessary. We will include exploratory analyses of subgroups, defined by gender, age (<70 vs ≥70 years), baseline BMI (27.0-34.9, 35-44.9, ≥45 kg/m<sup>2</sup>), county, and race to determine any differential pain responses.

#### Secondary Aims

Repeated measures mixed linear models similar to Aim 1 will be used to analyze WOMAC function, 6-minute walk, and SF-36 physical subscale. Each outcome will be modeled separately, and 18-month effectiveness will be tested based on a two-tailed significance level of 0.05. The model will include the fixed effects study arm, time, time-group interaction, county, gender, baseline BMI, and baseline values of the outcome; participant ID number will be included as a random effect, and an unstructured covariance will be used assuming model convergence is not a problem (AR[1] otherwise). Preliminary analyses will be conducted to check the shape of the distributions and variances between groups and as a function of the covariates. Regression diagnostics and residual plots will help to find appropriate transformations, if necessary.

#### Missing Data

If missing data are related to outcomes, our results could be biased. Our models will include variables from previous visits determined to predict loss to satisfy Little and Rubin's conditions for data considered missing at random (MAR). If "informative censoring" occurs, we will compare analyses using subjects with complete data, multiple imputations, or explicit modeling of the censoring mechanism (Conaway, 1993, Wu and Bailey, 1989).

#### Primary Outcomes

*Aim 1.* A total sample of 820 (410/group) will provide 94% statistical power to detect differences ≥15% in pain at the 2-sided 0.05 significance level with 80% retention (2-sample t-test, Nquery Advisor). Based on ADAPT (Messier et al). The D+E group in IDEA reduced pain by an average of 51%. This approach utilizes the conditional variance approach of Borm et al. for the estimation of power for ANCOVA models using group standard deviation  $\sigma = 3.50$ , Pearson correlation between baseline and 18-month pain score of  $\rho = 0.4$  for a conditional standard deviation  $\sigma_c = 3.21$  ( $\sigma_c = \sqrt{1 - \rho^2} \times \sigma$ ), and 18-month treatment WOMAC pain means ~D+E = 5.03 vs E-only control = 5.92 ( $\Delta = -0.887$ ). Variations of anticipated power due to modifications in retention and treatment effect are presented in Table 1. Correlation between baseline and 18 month pain values are estimated from the IDEA trial, while anticipated treatment effects and standard deviation for pain were obtained using weighted averages of D+E and non-D+E treatments from the ADAPT and IDEA studies, with some attenuation of the anticipated treatment effect due to the pragmatic nature of WE-CAN (Table 1).

**Table 1: Power estimates for WOMAC pain, assuming baseline N=820, correlation between BL and 18 months=0.4, and common group SD = 3.50.**

| 18 month Control Mean WOMAC                                                                                                                                                                                                                 | 18 Month D+E WOMAC Pain (% difference from Control mean*) | 18-Month Retention |        |                            |     |
|---------------------------------------------------------------------------------------------------------------------------------------------------------------------------------------------------------------------------------------------|-----------------------------------------------------------|--------------------|--------|----------------------------|-----|
| <b>Table 2: Detectable absolute and relative (%) differences for secondary outcomes, n = 410/group, 80% retention, 85% statistical power, <math>\alpha = 0.05</math>. Correlation between baseline and 18M values is <math>\rho</math>.</b> |                                                           |                    |        |                            | 85% |
| Variable                                                                                                                                                                                                                                    | Anticipated 18M Control mean                              | Standard Deviation | $\rho$ | D+E Mean (% change from C) |     |
| WOMAC Function                                                                                                                                                                                                                              | 4.91 (17%)                                                | 11.5               | 0.6    | 15.3 (-12.3%)              | 98% |
| Mobility: 6-Minute Walk (m)                                                                                                                                                                                                                 | 509                                                       | 90.7               | 0.7    | 524 (3.0%)                 | 97% |
| SF-36 Physical Score (0-100)                                                                                                                                                                                                                | 42.0                                                      | 10.1               | 0.5    | 44.1 (4.9%)                | 94% |

Secondary Outcomes Aim 2. Our sample size provides a moderate effect size of 0.234 at 85% power with relevant detectable differences. However, all estimates

from IDEA and ADAPT were collected under rigorously controlled conditions; therefore the estimates for the pragmatic trial are conservative. We assume in Table 8 a total baseline sample size of N=820, 80% retention at 18 months, and a 0.05 level of significance for all tests. The detectable and % differences from control aim to achieve 85% power. The mean differences in WOMAC function for D+E compared to D only and E only in IDEA were -3.3 and -4.3, respectively. Likewise, the differences in 6-minute walk distance for the D+E group versus D only in IDEA and ADAPT (41.5 and 42.1, respectively) indicate that the mean difference to achieve 85% power (15.2 m) is modest. IDEA indicated that SF-36 physical subscale was significantly improved in the D+E arm, with an observed difference of 2.8 compared to E alone (Table 2).

495  
496  
497  
498  
499  
500  
501  
502  
503  
504  
505  
506  
507  
508  
  
509  
510  
511  
512

## References:

- 513  
514 **The ARIC investigators.** The Atherosclerosis Risk in Communities (ARIC) Study: design and objectives.  
515 Am.J.Epidemiol. 1989 Apr;129(4):687-702.  
516
- 517 **Bauer UE, Briss PA, Goodman RA, Bowman BA.** Prevention of chronic disease in the 21st century:  
518 elimination of the leading preventable causes of premature death and disability in the USA. Lancet.  
519 2014;384(9937):45-52  
520
- 521 **Bhaskaran K, Douglas I, Forbes H, dos-Santos-Silva I, Leon DA, Smeeth L.** Body-mass index and risk of  
522 22 specific cancers: a population-based cohort study of 5.24 million UK adults. Lancet. 2014;384(9945):755-  
523 65.  
524
- 525 **Brooks R** (1996). EuroQol: the current state of play. Health Policy 37(1):53-72.  
526
- 527 **Campbell PT.** Obesity: a certain and avoidable cause of cancer. Lancet. 2014;384(9945):727-8.  
528
- 529 **Conaway MR.** Non-ignorable non-response models for time-ordered categorical response data. *Applied*  
530 *Statistics* 42: 105-115, 1993.  
531
- 532 **The EuroQol Group** (1990). EuroQol-a new facility for the measurement of health-related quality of life. Health  
533 Policy 16(3):199-208.  
534
- 535 **Fortney JC, Pyne JM, Mouden SB, Mittal D, Hudson TJ, Schroeder GW, et al.** Practice-based versus  
536 telemedicine-based collaborative care for depression in rural federally qualified health centers: a pragmatic  
537 randomized comparative effectiveness trial. AmJ Psychiatry. 2013;170(4):414-25.  
538
- 539 **Gooch K, Marshall DA, Faris PD, Khong H, Wasylak T, Pearce T, et al.** Comparative effectiveness of  
540 alternative clinical pathways for primary hip and knee joint replacement patients: a pragmatic randomized,  
541 controlled trial. OsteoarthritisCartilage. 2012;20(10):1086-94.  
542
- 543 **Guralnik JM, Simonsick EM, Ferrucci L, Glynn RJ, Berkman LF, Blazer DG, Scherr PA, Wallace RB.** A  
544 short physical performance battery assessing lower extremity function: association with self-reported disability  
545 and prediction of mortality and nursing home admission. J Gerontol. 1994 Mar;49(2):M85-M94.  
546
- 547 **Laird NM and Ware JH.** Random-effects models for longitudinal data. *Biometrics* 38: 963-974, 1982.  
548
- 549 **Little RJA and Rubin DB.** *Statistical analysis with missing data.* New York: John Wiley and Sons, 1987.  
550
- 551 **Messier, S.P. et al.** Effects of intensive diet and exercise on knee joint loads, inflammation, and clinical  
552 outcomes among overweight and obese adults with knee osteoarthritis. *JAMA* 310: 1263-1273. 2013.  
553
- 554 **Messier SP, Loeser RF, Miller GD, Morgan TM, Rejeski WJ, Sevick MA, Ettinger WH, Jr., Pahor M,**  
555 **Williamson JD.** Exercise and dietary weight loss in overweight and obese older adults with knee osteoarthritis:  
556 the Arthritis, Diet, and Activity Promotion Trial. Arthritis Rheum. 2004 May;50(5):1501-10.
- 557 **Nasreddine ZS, Phillips NA, Bedirian V, Charbonneau S, Whitehead V, Collin I, Cummings JL, Chertkow**  
558 **H.** The Montreal Cognitive Assessment, MoCA: a brief screening tool for mild cognitive impairment.  
559 J.Am.Geriatr.Soc. 2005 Apr;53(4):695-9.  
560
- 561 **National Rural Health Association.** What's different about rural health care? : National Rural Health  
562 Association; 2014
- 563 **Penninx BW, Messier SP, Rejeski WJ, Williamson JD, DiBari M, Cavazzini C, Applegate B, Pahor M**  
564 **Physical exercise and the prevention of disability in activities of daily living in older persons with osteoarthritis.**  
565 Arch.Intern.Med. 2001 Oct 22;161(19):2309

566  
567  
568  
569  
570  
571  
572  
573

**Pescatello, L.S, & American College of Sports Medicine.** (2014). ACSM's guidelines for exercise testing and prescription (Ninth edition.). Wolters Kluwer/Lippincott – Williams & Wilkins Health.

**Schmidt B, Wenitong M, Esterman A, Hoy W, Segal L, Taylor S, et al.** Getting better at chronic care in remote communities: study protocol for a pragmatic cluster randomised controlled of community based management. *BMC Public Health*. 2012;12:1017.

574

**Thompson FE et al.**, J American Dietetic Association 2002, vol 102, pp 212-225

575

**United States Department of Agriculture.** Rural america at a glance: Economic Research Service; 2013 [updated 11/1/2013]

576

577

578

579

**Ware JE, Jr., Sherbourne CD.** The MOS 36-item short-form health survey (SF-36). I. Conceptual framework and item selection. *Med.Care* 1992 Jun;30(6):473-83.

580

581

582

583

**Wu MC and Bailey KR.** Estimation and comparison of changes in the presence of informative right censoring: conditional linear model. *Biometrics* 45: 939-955, 1989.

584 **Study Protocol with Final Amendments**

585  
586  
587 Weight loss and Exercise for Communities with Arthritis in North Carolina (WE-CAN)

588  
589  
590 8/26/20

591 **Principal Investigator**

592 Stephen P. Messier, PhD

593  
594 **Co- Principal Investigator**

595 Leigh Callahan, PhD

596  
597 **Site Principal Investigators**

598 Dan Beavers, PhD, Leigh Callahan, PhD, Stephen P. Messier, PhD, Kate Queen, MD

599  
600 **Co-investigators**

601 Richard Loeser Jr., MD, Mary Lyles, MD, Shannon Mihalko, PhD, Gary Miller, R.D. PhD, Joanne Jordan, MD,  
602 MPH, Jeffery Katz, MD, MSc, Elena Losina, PhD, MSc, Sara Quandt, PhD

603  
604 **Consultants**

605 Paul DeVita, PhD, David Hunter, MD

606  
607  
608 **Project Description:**

609 The global prevalence of knee osteoarthritis (OA) is estimated at greater than 250 million persons or 3.6% of  
610 the world population, ranking 23<sup>rd</sup> on the list of the most common sequelae. Knee OA is the most prevalent  
611 cause of mobility dependency and disability, with the time spent living with symptoms averaging 26 years.  
612 More than two-thirds of Americans age  $\geq 20$  years are overweight or obese. Two in three people who are obese  
613 will develop symptomatic knee OA in their lifetime. In addition to the strong relationship between obesity and  
614 knee OA, a recent systematic review found no healthy consequences of overweight/obesity, even in individuals  
615 who are metabolically healthy.

616  
617 In 2004 we reported that a 5% weight loss, when combined with exercise, resulted in a 30% decrease in pain  
618 and a 24% improvement in function. Our recently completed trial entitled Intensive Diet and Exercise for  
619 Arthritis (IDEA) sought to improve on our work with a more intensive weight loss intervention, 2 to 3 times the  
620 weight loss we had recently achieved. IDEA compared intensive diet (D) and exercise (E) interventions,  
621 separately and in combination, across an 18-month intervention period in 454 overweight and obese older adults  
622 with radiographic knee OA. An intent-to-treat analysis revealed that after 18 months the D+E group reduced  
623 pain by 51% compared to 25% and 28% for the D only and E only groups, respectively. The D+E group was  
624 also superior to the E group on self-reported physical function, health related quality of life, and walking speed,  
625 and had significantly lower knee joint loading and serum levels of IL-6, a pro-inflammatory cytokine. On  
626 average, our D+E intervention was twice as effective at relieving pain as previous long-term OA trials. We  
627 concluded that wider adoption of intensive weight loss with a goal of at least 10% of baseline body weight  
628 combined with exercise could reduce the burden of disability related to knee OA.

629  
630 IDEA was an efficacy study with impressive results, a trial designed to determine the effects of intensive diet  
631 and exercise *under ideal circumstances*. However, a common concern from physicians who treat people with  
632 knee OA is lack of practical means to implement this treatment in the clinical environment. Indeed, there is no

evidence regarding how this efficacious intervention could be successfully adapted to be effective in real world clinical and community settings and also be cost effective.

We plan to conduct the first long-term (18 months) pragmatic (i.e., effectiveness) trial of intensive diet and exercise in older adults with knee OA under more usual conditions in both rural and urban communities across North Carolina. Participants (age  $\geq 50$  years; BMI  $\geq 27$  kg/m<sup>2</sup>) will be randomized to one of 2 groups: diet-induced weight loss and exercise or an attention control group. The sample will consist of 820 ambulatory, community-dwelling persons that meet the ACR clinical criteria for knee osteoarthritis. The primary aim is to compare the intervention effects on knee pain. Secondary aims will compare the intervention effects on self-reported function, mobility, health related quality of life, and the cost effectiveness and budgetary impact of the intervention.

This program will deliver state-of-the-art weight-management techniques using procedures that are new to this area of research in a community setting. Our proposed study is innovative in at least 6 important ways.

7. ***The first long-term trial of diet-induced weight loss and exercise in adults with knee OA delivered in a practical, less rigorously monitored, community setting.*** We will design and implement this intervention to make it cost-effective and to serve as a blueprint for diverse communities nationwide. If successful, the results can inform healthcare payers about the first non-pharmacologic treatment of proven benefit for overweight and obese adults with knee OA that also promises to decrease medical care costs.
8. ***The first pragmatic behavioral health trial targeting rural and urban sites.*** Few pragmatic trials have focused on rural populations (Fortney et al; Gooch et al; Schmidt et al), and none was designed to affect behavior change using community health interventionists. About 25% of the US population lives in diverse rural communities. Most have fewer services and resources than urban communities (US Dept. of Agr). They report poorer health-related quality of life (National Rural Health Assoc.), reflecting higher prevalence of many disorders, including OA. Tailoring a non-pharmacologic intervention for communities with limited healthcare access would be a breakthrough for public health (National Rural Health Assoc.).
9. ***The first evidence that this non-pharmacologic intervention can be implemented cost-effectively in US communities.*** Successful results will lead to step-by-step guidelines regarding the selection of community intervention sites, ways to engage the medical community, and how to deliver a weight-loss and exercise intervention. In addition to the well-established association between obesity and knee OA, strong relationships exist between high BMI/obesity and coronary heart disease, type 2 diabetes, high blood pressure, stroke, dyslipidemia, and certain types of cancer (Bhaskaran et al; Campbell ). This trial will provide a model for community leaders to develop and execute an effective diet and exercise program at a reasonable cost that will engage local physicians and healthcare providers who treat knee OA, obesity, and related comorbidities.
10. ***A practical treatment option for physicians who treat the comorbidities associated with high BMI.*** Both the CDC and the American Cancer Society have strategic initiatives that encourage community-based interventions to effectively reduce overweight and obesity (Bauer et al; Campbell).
11. ***Focus on implementation and scalability of treatment approaches.*** The innovative features of the proposed study will bridge short-term efficacy and long-term outcomes. Identifying and applying the factors critical for intervention sustainability ensure translation from research to practice.
12. ***Formal assessment of cost-effectiveness and Budget Impact Analysis.*** Although rarely performed in pragmatic trials, we will formally assess the cost-effectiveness of the implemented strategies. Results will allow clinicians and policymakers to assess the feasibility of community-based implementation



The proposed study is uniquely designed to identify a practical, effective, non-pharmacologic therapy capable of reducing knee pain and improving function and quality of life in rural and urban communities of older, overweight and obese adults with knee OA.

### **Primary Hypothesis and Aim**

**Hypothesis 1.** A pragmatic, community-based, diet-induced weight-loss and exercise intervention will significantly reduce knee pain among overweight and obese adults aged  $\geq 50$  years with knee OA compared to an attention-control group.

**Aim 1.** To determine whether a pragmatic, community-based, 18-month diet-induced weight-loss and exercise intervention implemented in three North Carolina counties with diverse residential (from urban to rural) and socioeconomic composition significantly decreases knee pain [as measured by the Western Ontario McMasters Universities Osteoarthritis Index (WOMAC) pain subscale] in overweight and obese adults with knee OA compared to an attention-control group.

### **Secondary Hypotheses and Aims**

**Hypothesis 2.** A pragmatic, community-based, diet-induced weight-loss and exercise intervention will significantly improve self-reported function, health-related quality of life, and mobility among overweight and obese adults aged  $\geq 50$  years with knee OA compared to an attention-control group.

**Aim 2.** To determine whether a pragmatic, community-based, 18-month, diet-induced weight-loss and exercise intervention improves WOMAC self-reported function, health-related quality of life as measured by the physical subscale of the SF-36 questionnaire and 6-minute walk distance (an accepted measure of mobility) in overweight and obese adults with knee OA compared to an attention control group.

**Hypothesis 3.** A pragmatic, community-based, diet-induced weight-loss and exercise intervention will be a cost-effective addition to treatment modalities in overweight and obese persons with knee OA.

**Aim 3.** To establish the cost-effectiveness of this pragmatic, community-based, multimodal diet-induced weight-loss and exercise program by conducting cost-effectiveness and budgetary impact analyses using data from the current trial in a validated computer-simulated model of knee OA.

### **Study Design**

We will randomize 820 overweight and obese ( $BMI \geq 27 \text{ kg/m}^2$ ), adults age  $\geq 50$  yrs knee OA into one of 2 groups: an intensive dietary restriction-plus-exercise (D+E) group or an attention control (nutrition and health) group. Persons who have begun screening once we hit our overall recruitment goal of 820 will be allowed to complete the screening process therefore up to 840 persons may be enrolled into the study. Forsyth, Johnston, and Haywood Counties' recruitment goals are 420, 210, and 210, (total 840) respectively. Our minimum weight-loss goal for the weight-loss group will be 10% of body weight. The exercise intervention will meet 3 days/wk at the clinical site. The intervention will be comprised of both aerobic and strength training exercises. When participants are unable to come into the facility for intervention, sessions will be conducted via phone or through video conferencing. The nutrition and health group will meet 5 times over an 18 month period and receive a combination of webinars, video messages, text messages, emails (via personal email or Facebook), phone calls, and mailings for the remaining months. Participants will be allowed to choose their preferred method.

### **Primary Endpoint**

Western Ontario McMasters Universities Osteoarthritis Index (WOMAC). We will measure self-reported physical function and pain using the WOMAC (scores will be pulled from the KOOS Questionnaire in which the WOMAC is embedded). The LK version asks participants to indicate on a scale from 0 (none) to 4 (extreme) the degree of difficulty experienced in the last week due to knee OA. Individual scores for the 17 items are totaled to generate a summary score that could range from 0-68, with higher scores indicating poorer function. The pain index assesses participants' pain on the same scale, ranging from 0 (none) to 4 (extreme). The pain subscale consists of 5 items and total scores can range from 0-20, with larger scores indicating greater dysfunction. This instrument has been validated and recommended by the Osteoarthritis Research Society as the health status measure of choice in older adults with knee OA. In order to measure the minimal clinically improvement difference (MCID) participants will be asked to compare their knee pain to how it was at the beginning of the study.

### **Secondary Endpoint**

**Mobility.** Our primary mobility measure will be 6-minute walk distance. Participants are told to walk as far as possible in 6 minutes on an established course. No personal timing devices are permitted, and participants are not provided feedback during the test. Results are significantly correlated to treadmill time and symptom-limited maximal oxygen consumption ( $r = 0.52$  and  $r = 0.53$ , respectively) and have a 3-month test-retest reliability of 0.86 (Pennix et al). The Short Physical Performance Battery (SPPB) will also be used to measure mobility (Guralnik et al). The SPPB is comprised of the following tests (balance, walking speed, and chair rise). A test of ascending and descending stair activity measured by the time (in seconds) it takes to ascend and descend a flight of 8 steps with 20cm (8 inch) step height and handrail will also be performed.

**Cost Effectiveness** Resource utilization will be collected by questionnaire, with domains including visits to clinicians (physicians, nurses, physical therapists, others), tests, medications, injections, surgery, alternative therapies. The Work Productivity and Activity Impairment index (WPAI) will be used to assess absenteeism and reduced productivity while at work (presenteeism).

**Body weight, height, hip/waist circumference, BMI.** Body weight and height will be obtained using standard techniques. Only persons with a  $BMI \geq 27 \text{ kg/m}^2$  will be eligible. Circumference measurements will be collected using standard techniques.

**Medical History, Medications, and Blood Pressure.** Participants will be given forms to assess medical history and presence of comorbidities. Participants will also be asked questions about their medical history during the phone screen so as to reduce participant burden by identifying potential exclusion criteria. Participants will be administered a medication questionnaire adapted from the ARIC study and widely used in field research and in our prior studies at each testing visit (ARIC).

It is designed to obtain information about all prescription and over-the-counter medicines and supplements used during the 2 weeks prior to the interview (home or clinic). The participants will be mailed the medication form to fill out at home and will return the form to the interviewer. Participants may also be asked to provide the interviewer with all medicine containers so that the interviewer can transcribe the information. In addition participants will be encouraged to notify the study staff of any medication changes during the course of the study.

In addition to the medical history and medication questionnaires, participants will also be given a risk stratification questionnaire at the first screening visit. The purpose of this questionnaire is to determine if participants will need medical clearance prior to enrolling into an exercise program. The determination is based on the presence/absence of cardiovascular/pulmonary/metabolic disease risk factors, sign and symptoms, and known medical history. The following schematic demonstrates how medical clearance will be determined (Figure 1). The American College of Sports Medicine recommends that all patients are first screened to

determine if they are participate in regular exercise (defined as performing planned, structured physical activity at least 30 min at moderate intensity on at least 3 days per week for at least the last 3 months). If the participant responds with no medical clearance will be not be needed for those who have not been diagnosed with any CV, Metabolic, or renal disease and are showing no signs/symptoms. If the response is yes those who have not been diagnosed as well as those with a diagnosis and are asymptomatic will not need physician clearance (Riebe et al., 2015). Like the previous recommendations this is only for moderate intensity exercise. Our exercise protocol falls within this moderate intensity range. The original protocol called for participants to exercise in the range of 50-75% of their maximal heart rate reserve (i.e., moderate to high intensity). The range was previously modified to 40-60% of maximal heart rate reserve (i.e., moderate intensity). Hence, participants that have no diagnosis of CV, Metabolic, or renal disease or those that have been diagnosed but are asymptomatic will be enrolled without the need for physician clearance. *Those who have signs and symptoms or who have been diagnosed but do not meet the exercise criteria will require medical clearance from their physician.* Final approval and acceptance into the program for patients will be provided by our study physician. It's worth noting the risk of serious adverse events occurring during properly supervised exercise is extremely low (< 1 per 100,000 hours of exercise) even in older adults, with cardiovascular disease. Blood pressure will also be measured.

Figure 1: Exercise preparticipation health screening logic model for aerobic exercise participation (Updating ACSM's Recommendations for Exercise Preparticipation Health Screening, MSSE 2015)

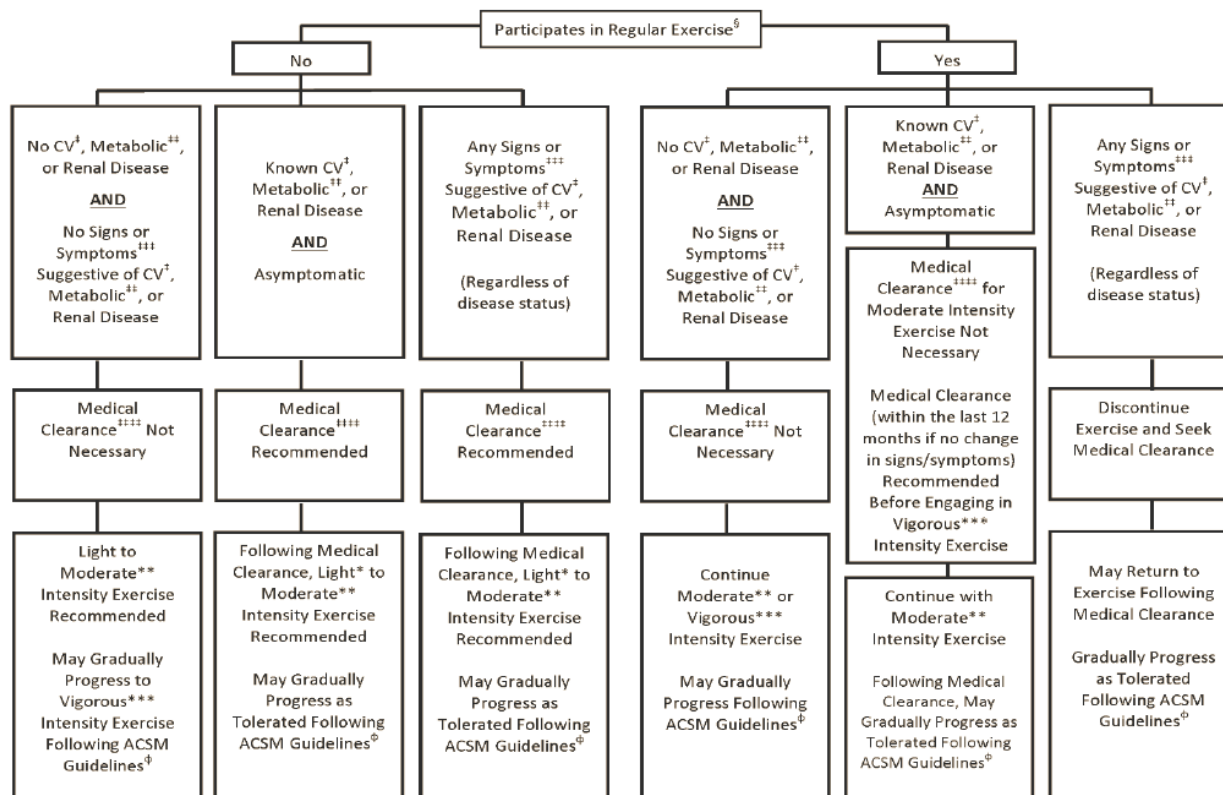

Measures of Quality of Life and Self-Efficacy. The SF-36 is the most widely used and carefully validated measure of health related quality of life and will be used to yield 2 broad summary scores: physical health and mental health (Ware and Sherbourne). The Eurqol Quality of Life will also be used to measure quality of life and health state (Brooks; EuroQuol). The walking efficacy for duration scale measures one's ability to walk/jog at a moderately fast pace for various durations (McAuly and Mihalko). The Positive and Negative Affect

(PANAS) measures both positive and negative affect, leading to more insightful outlooks regarding participants' feeling states. This scale consists of 20 items that reflect the intensity of how the participant "feels" right now (Watson et al). The gait efficacy/environmental efficacy scale will ask the participants' confidence in performing certain activities (McAuley et al.). Among the various components of subjective well-being, the Satisfaction with life scale is focused to assess global life satisfaction (Diener et al). The Weight Efficacy Lifestyle Questionnaire (WEL) is a 20-item measure employed to assess self-efficacy for weight management (Clark et al). The Perceived Stress Scale (PSS) will measure the degree to which people perceive their lives as stressful (Cohen et al). The adherence self-efficacy questionnaire is designed to assess beliefs in one's ability (confidence) to continue exercising at various intensities and frequencies (McAuly and Mihalko).

Pain Catastrophizing Scale (PCS). The PCS questionnaire will be used to assess catastrophizing (rumination, magnification, and helplessness) (Sullivan et al).

Knee injury and Osteoarthritis Outcome Score (KOOS). The KOOS questionnaire will be used to assess the patient's opinion about their knee and associated problems. The KOOS evaluates both short-term and long-term consequences of knee injury and also consequences of primary osteoarthritis (OA) (Roos & Lohmander).

Intermittent and Constant Osteoarthritis Pain (ICOAP). The ICOAP assesses pain in individuals with knee osteoarthritis taking into account both constant and intermittent pain experiences (Hawker et al).

Dietary Intake. National Cancer Institute Modified Health Habits and History Questionnaire (HHHQ) provides nutrient assessment of dietary intake.\_

Health Literacy. Behavioral Risk Factor Surveillance System measures health literacy.

Physical Activity. The Physical Activity Scale for the Elderly (PASE) has proven reliable in many of our clinical trials, including a group of 254 men and women aged  $\geq 65$  yrs (Washburn et al).

Cognitive Functioning/Depression. The MOCA will be used to measure cognitive function (Nasreddine et al). Depression will be measured using the Center for Epidemiologic Studies Depression Scale (Burnam et al).

### **Inclusion/Exclusion Criteria**

#### *Inclusion Criteria:*

- (4) Age  $\geq 50$  years
- (5) Knee Pain plus ACR Criteria for Knee Osteoarthritis
- (6) BMI =  $27 \geq \text{kg/m}^2$

#### *Exclusion Criteria:*

7. Significant co-morbid disease that would threaten safety or impair ability to participate in interventions or testing (Method: Medical history; medications; physical exam; telephone pre-screen; risk stratification)
  - a. Blindness
  - b. Type 1 diabetes
  - c. History or symptoms of coronary artery disease or pulmonary disease with no medical clearance (symptoms include angina, unreasonable breathlessness, dizziness/fainting/blackouts)
  - d. Unable to walk without a device

- 856 e. Lower extremity fracture (within previous 3 months)  
 857 f. Joint Replacement (excluded if double KR or within previous 6 months)  
 858 g. Knee injection or surgery (within previous 3 months)  
 859 h. Lower extremity injury that affects activities of daily living  
 860 i. Bariatric Surgery
- 861 8. Not sufficiently overweight or obese, BMI < 27 kg/m<sup>2</sup> (Method: Ht/Wt)  
 862 9. Not having knee pain: (Method: < 1 on the pain scale, WOMAC and Telephone Screen)  
 863 10. Inability to finish 18-month study or unlikely to be compliant (Method: Telephone Screen, Screening  
 864 Interviews)
- 865 a. Planning to leave area > 2 month during the next 18 months  
 866 b. Unwilling to change eating or physical activity habits  
 867 c. Unwilling to attend exercise/diet sessions  
 868 d. Participating in another intervention study (only if the other study has requested they not be  
 869 enrolled)  
 870 e. Living > 30 minutes from the intervention site
- 871 11. Age, age < 50 (Method: Telephone Screen & Demographics Forms)  
 872 12. Other conditions that may prohibit the effective delivery of the intervention (Method: Telephone Screen)
- 873 a. Unable to provide own transportation to exercise center  
 874 b. Unable to read or write, cannot speak or read English

#### 875 Randomization Procedures

876 We propose a stratified block randomization with block size unknown to investigators and staff will ensure  
 877 equal accrual to each study arm. Prestratification will balance pretrial BMI values (27.0-34.9 kg/m<sup>2</sup>, 35.0-44.9  
 878 kg/m<sup>2</sup>, ≥45 kg/m<sup>2</sup>) and gender, which could predict intervention effect and associations between secondary  
 879 outcome variables. We will also use county as a fixed effect for randomization. A computer program will  
 880 randomize participants into the 2 groups, verify eligibility, and provide identification number and intervention  
 881 assignment. This system worked very successfully in the IDEA study.

#### 883 Interventions

##### 884 Diet-induced weight loss plus exercise

###### 885 *Months 0 -6*

886 There will be two individual sessions per month and 2 group sessions per month for the first 6 months.  
 887 The behavioral sessions will focus on awareness of changing eating habits to lower caloric intake.  
 888 Educational content information regarding what food changes to make, how to make them, and why  
 889 they are important will be clearly explained and discussed with participants and significant others.  
 890 Each group session will include problem solving, review of a specific food topic, and tasting of several  
 891 well-balanced, low-fat, nutritious foods prepared with widely available ingredients. During the  
 892 individual sessions, the counselor will review individual progress, solve problems, answer questions,  
 893 and set goals. During the initial individual session, the nutrition counselor will give the participant a  
 894 weight history background questionnaire. The major emphasis for Period 1 is to enhance participant  
 895 awareness of the importance and the need to change eating habits, i.e. lower caloric intake for weight  
 896 loss. Each participant should be given the opportunity to practice skills using goal setting in a stepwise  
 897 approach. Participants will follow a weekly menu plan which will incorporate meal replacements into  
 898 their diet plan. Lean Shakes, a General Nutrition Center (GNC), product will be the meal replacement  
 899 used. Participants may replace the Lean Shakes with a healthy, low-calorie meal of their choice, such

as Lean Cuisine. Motivation and encouragement through the combined efforts of the nutrition counselor, the participant, significant others and the nutrition staff will enhance adherence.

#### *Months 7-12*

In period 2 participants will focus on continued weight loss to reach the study weight loss goal of 10% of baseline weight. Participants will attend one group and one individual session per month. Once the weight loss goal is achieved an individual may either begin weight maintenance, or they may continue to lose additional weight using safe and healthy nutrition practices. Participants will follow a weekly menu plan with recipes using traditional foods and the option to incorporate meal replacements. The traditional meals will contain 400-600 kcals, be low in fat and added sugars, and high in vegetables, fruits, and whole grains. Snacks may be a bar, fruit, or vegetable providing ~100-120 kcals. Daily caloric intake for each participant will be adjusted to his or her rate of weight change. Each group will be encouraged to take a daily multivitamin/mineral supplement containing no more than 100% of the Dietary Reference Intake for any particular nutrient. As fewer meal replacements are consumed, intervention staff will assist in developing meal plans to provide the prescribed macronutrient-balanced energy intake.

#### *Months 13-18*

Period 3 will emphasize weight management over time, with 1 monthly individual contact. Weight loss can continue throughout the intervention, provided the participant wants to and has not reached a level associated with health hazards; i.e. a 20% body weight loss at 6 months or >30% at 12 months. Participants will continue to follow a weekly menu plan with recipes using traditional foods and the option to incorporate meal replacements.

The exercise intervention will cover an 18-month period. The exercise program will consist of a 15-minute aerobic phase, a 20-minute strength-training phase, a second 15-minute aerobic phase, and a 10-minute cool-down phase. These sixty-minute exercise sessions will be conducted three days per week (two days/week will be center based). Each participant will be prescribed an individual walking prescription by the exercise leader, which will be adjusted accordingly, as each participant progresses throughout the 18 months. The exercise will be of moderate intensity. Alternate forms of aerobic exercise, such as but not limited to stationary bike, elliptical trainer, or treadmill walking, can be used in place of over-ground walking. This choice could be based on participant preference, the limitations of the exercise facility, or the participant's pain level. To motivate participants to be physically active intervention staff will plan an optional fun walk. The walk will take place at Wake Forest University. Participants do not have to participate in the walk in order to be in the study. If a participant chooses to participate in the walk they will be asked to sign a waiver.

Intervention Locations: *Forsyth County*: The diet and exercise classes will be offered at a number of sites within Winston-Salem. Participants will be allowed to pick the location that is most convenient for them to attend. Classes will take place at the Clinical Research Center on the Wake Forest University Campus, at St. Peter's World Outreach Center, and at Smiley's Fitness. *Haywood County*: The diet and exercise classes will be held at the Haywood Regional Health & Fitness Center in Waynesville, NC. *Johnston County*: The diet and exercise classes will be held at the Clayton Community Center and the Johnston Medical Mall. Participants will also be allowed to exercise outdoors at the intervention sites when the weather permits. Staff will schedule set times when outdoor walking will be allowed.

The following measures will be taken in the event participants are unable to come into the facility:

1. Virtual Sessions - Participants will be given the option to attend virtual exercise and diet classes. Intervention classes will be taught via Zoom. Participants will be provided with the class login information. The group and diet exercise sessions will be recorded and posted to

our study Facebook page as well as sent to participants who are unable to attend the live sessions. Recordings will be edited so that only the class exercise and diet instruction can be viewed (beginning and end of the session as participants log in and out will be cut out of the video). As a security measure the virtual classes will be locked after 10 minutes so that no others can join the class. Additionally participants will not be given access to record the session. Individual sessions will also be conducted via Zoom.

2. Phone Sessions – Staff will call participants to deliver the diet group and individual session content. All participants have previously been provided with at home exercise manuals. Staff will also use this time to review our non-facility-based exercise plans.
3. Email Sessions – Participants may also choose to receive the diet group and individual session content via email. All participants have previously been provided with at home exercise manuals. Staff will also use this time to review our non-facility-based exercise plans.

All intervention staff in the WE-CAN study will be CPR certified. The exercise coordinator, who is part of the coordinating center and is responsible for maintaining exercise protocol congruity between the intervention sites, will train and supervise the intervention staff. Intervention staff will meet monthly with the exercise coordinator to discuss any potential problems, risks, and concerns that have arisen. AEDs will be available at each location. Emergency drills will be performed monthly in addition the AED will be checked monthly. The clinical research center (Forsyth), Johnston Medical Mall (Johnston), and the Haywood Regional Health and Fitness Center (Haywood) also house cardiac rehabilitation programs and will also have crash carts available.

### Nutrition & Health Intervention

The nutrition and health (attention control) intervention will cover an 18-month period. There will be five total face to face group meetings over the 18 months, with one meeting each at months 1, 3, 6, 9, and 15; and during the other months (months 2, 4-5, 7-8, 10-14, 16-18) participants will receive a combination of informational packets, webinars, text messages, and emails. Participants will be able to select their preferred method. Each group meeting will last approximately one hour and will be held at St. Peter's World Outreach Center and at Senior Services in Winston-Salem, NC. The sessions will be interactive and will provide useful information on such topics as proper foot care, general nutrition, health behaviors, management of medications, and sleep practices. The Community Advisory Board will give input on the class sessions.

Experts across a broad range of relevant topics that are of interest to older adults will provide information via information packets, webinars, text messages or emails. These monthly contacts and email blasts will keep the participants in the nutrition and health group engaged in the WE-CAN study and will increase adherence to the group sessions and the testing visits.

Participants in both interventions will be provided with items with the study logo such as t-shirts and tote bags to promote group bonding and study adherence. Additionally, giftcards will be raffled at various class sessions. In order to better balance the amount of money spent on the two groups participants in the Nutrition & Health group will receive a \$100 (gift cards) for completing the testing appointments. They will be given \$25 at 6 months and \$75 at 18 months. At the 12-month testing appointments the participants will receive an incentive with the study logo. Participants in the Diet & Exercise group will be receiving meal replacements for the first year of the study.

995 Procedures-Screening and Follow-up Visits.

| Measurements                                                                                      | PSV | SV1 | FU6 | FU12 | FU18 | Explanation                                                                          |
|---------------------------------------------------------------------------------------------------|-----|-----|-----|------|------|--------------------------------------------------------------------------------------|
| <b>Questionnaires</b>                                                                             |     |     |     |      |      |                                                                                      |
| Informed Consent                                                                                  |     | x   |     |      |      |                                                                                      |
| Eligibility Questionnaire                                                                         | x   |     |     |      |      | To determine eligibility                                                             |
| Medical History/Med History FU                                                                    | xc  | x   | x   | x    | x    | For eligibility and to document changes in health                                    |
| Risk Stratification                                                                               | xc  | x   |     |      |      | Used to screen cardiovascular risk                                                   |
| Comorbidities Questionnaire                                                                       |     | x   |     | x    | x    |                                                                                      |
| Randomization                                                                                     |     | x   |     |      |      |                                                                                      |
| WOMAC                                                                                             |     | x   | x   | x    | x    | Pain is primary and function secondary outcomes. Will be taken from the KOOS         |
| Knee Injury and Osteoarthritis Outcome Score (KOOS)                                               |     | x   | x   | x    | x    | Assesses patient's opinion about their knee and associated problems                  |
| PASE scale                                                                                        |     | x   | x   | x    | x    | Physical Activity Scale for the Elderly                                              |
| MOCA                                                                                              |     | x   |     |      | x    | Montreal Cognitive Assessment                                                        |
| EuroQol Quality of Life(EQ5D)                                                                     |     | x   | x   | x    | x    | Quality of life measure                                                              |
| Resource Utilization                                                                              |     | x   | x   | x    | x    | Visits to clinicians, tests, medications, injections, surgery, alternative therapies |
| Work Productivity and Activity Impairment Index                                                   |     | x   | x   | x    | x    | assesses absenteeism and presenteeism                                                |
| DHQ II                                                                                            |     | x   | x   | x    | x    | NIH Diet History Questionnaire                                                       |
| SF-36                                                                                             |     | x   | x   | x    | x    | Health related quality of life (physical, mental)                                    |
| Health Literacy                                                                                   |     | x   | x   | x    | x    |                                                                                      |
| Adherence Self Efficacy                                                                           |     | x   | x   | x    | x    | Confidence in exercising at various intensities and frequencies                      |
| Adherence for Duration                                                                            |     | x   | x   | x    | x    | Confidence in walking for different durations                                        |
| Gait Efficacy                                                                                     |     | x   | x   | x    | x    | Confidence in completing tasks                                                       |
| Demographics                                                                                      |     | x   |     |      |      |                                                                                      |
| Medication form                                                                                   |     | x   | x   | x    | x    | Atherosclerosis Risk in Communities form                                             |
| Weight Efficacy Questionnaire                                                                     |     | x   | x   | x    | x    | Self-Efficacy for Weight Management                                                  |
| PANAS                                                                                             |     | x   | x   | x    | x    | Positive and Negative Affect Scale                                                   |
| SWL                                                                                               |     | x   | x   | x    | x    | Satisfaction with Life                                                               |
| Perceived Stress                                                                                  |     | x   | x   | x    | x    | Stress                                                                               |
| Pain Catastrophizing Scale                                                                        |     | x   | x   | x    | x    | Catastrophizing                                                                      |
| Intermittent and Constant Osteoarthritis Pain (ICOAP)                                             |     | x   | x   | x    | X    | Intermittent and Constant Pain                                                       |
| CES-D                                                                                             |     | x   | x   | x    | X    | Depression                                                                           |
| Transition Questionnaire                                                                          |     |     | x   | x    | X    | Knee pain                                                                            |
| Adverse Events                                                                                    |     |     | x   | x    | X    | Also collected as they occur                                                         |
| <b>Physical Performance Tests/Knee Exam</b>                                                       |     |     |     |      |      |                                                                                      |
| height                                                                                            | xc  | x   |     |      |      | To determine BMI                                                                     |
| weight                                                                                            | xc  | x   | x   | x    | X    | To determine BMI                                                                     |
| Knee exam                                                                                         |     | x   |     |      |      | To determine eligibility                                                             |
| 6 minute walk                                                                                     |     | x   | x   |      | X    | Measure of mobility                                                                  |
| Expanded Short Physical Performance Battery (SPPB)                                                |     | x   | x   | x    | X    | Gait speed, sit to stand, balance tests; predicts disability                         |
| GaitRite                                                                                          |     | x   | x   | x    | X    | mobility measures                                                                    |
| Stair Climb                                                                                       |     | x   | x   | x    | X    | mobility measure                                                                     |
| xc = brief screen by self-report, PSV = Prescreening Visit. SV = screening visit. FU = follow-up. |     |     |     |      |      |                                                                                      |

996

997 Procedures-Screening and Follow-up Visits.

998 Prescreening visit (PSV). Individuals who contact our recruitment office in response to advertising will be  
999 asked a series of brief questions that focus on major eligibility criteria. A screening visit appointment will be  
000 made for participants who meet major eligibility criteria. A medical history form and a medication form will  
001 be mailed to the participants for them to complete. If participants are unable to come in for testing  
002 appointments research staff will call participants via Webex to collect study data (participants can choose  
003 whether to attend virtually or only via phone). Staff will use a HIPPA compliant version of Webex (set up by  
004 Wake Forest University). To reduce participant burden only the following questionnaires will be collected:  
005 cost effectiveness questionnaires, WOMAC, KOOS, Physical Activity Scale for the Elderly (PASE), Health-  
006 Related Quality of Life (HRQL), and efficacy measures. In the event participants do not wish to conduct a  
007 phone or virtual session a questionnaire packet will be mailed to participants to complete and return. The  
008 webex testing session will last approximately 1 hour.



009  
 010 Screening Visit One (SV1) Individuals will come to Worrell Professional Building on the campus at Wake  
 011 Forest University. SV1 includes an explanation of the study and obtaining informed consent. Other  
 012 assessments include medical history and medication use (previously mailed), cardiovascular risk, height and  
 013 weight (to calculate BMI), hip/waist circumference measurements, blood pressure, and a knee exam. The  
 014 MOCA & CES-D will be administered. The following questionnaires will be given: demographics, cost  
 015 effectiveness questionnaires, WOMAC, KOOS, Physical Activity Scale for the Elderly (PASE), Health-  
 016 Related Quality of Life (HRQL), dietary intake questionnaires, health literacy, perceived stress, pain  
 017 catastrophizing, and efficacy measures. Physical performance measures include the SPPB, 6 minute walk,  
 018 GaitRite, and stair climb. This screening visit will last approximately 3 - 4 hours.

019  
 020 Randomization Visit (RV) Individuals will come to Worrell Professional Building on the campus at Wake  
 021 Forest University. At the RV an orientation to the group will be done.

022  
 023 6-month Follow-up Data Collection Visit (FU6): Participants will return to Worrell Professional Building to  
 024 repeat all measures collected at baseline (minus the MOCA, knee exam, and demographics). The testing  
 025 session will last approximately 2.5 – 3.5 hours.

026  
 027 12-month Follow-up Data Collection Visit (FU12): Participants will return to Worrell Professional Building to  
 028 repeat all measures collected at baseline (minus the knee exam and demographics). The testing session will  
 029 last approximately 2.5 – 3.5 hours.

030  
 031 18-month Follow-up Data Collection Visit (FU18): Participants will return to Worrell Professional Building to  
 032 repeat all measures collected at baseline (minus the knee exam and demographics). The testing session will  
 033 last approximately 2.5 – 3.5 hours. At the end of 18 months the participants will have a mini session on what  
 034 the other group received.

#### 035 036 Usage of Facebook

037 The research study would like to incorporate the usage of Facebook in the study. We plan on using Facebook in  
 038 the following ways.

#### 039 040 1) Recruitment

- 041 a. The study has created digital ads (submitted with this amendment) that will be used in Facebook  
 042 ads. Ads posted will be pop up ads.

#### 043 044 2) Study Notifications & Contact Method

- 045 a. The study will set up a Facebook page in which participants will be given the link (usage will not  
 046 be required but will be an additional method that participants can use to contact study staff or  
 047 find out study information). A description of this usage is listed below.
- 048 i. Study info such as press releases, news articles, manuscripts will be posted to the study  
 049 Facebook page. This information will also be provided in study newsletters (for those  
 050 not on Facebook).
  - 051 ii. Information regarding site closings (such as in the event of inclement weather or  
 052 holidays) or intervention materials (group intervention classes) will be posted on the  
 053 Facebook page. Please note all participants will be given information regarding holiday  
 054 closings and weather policies in their intervention classes. A study phone number will be  
 055 given to each participant which will be updated in the event of a closing. It will not be  
 056 necessary to check Facebook to learn of a study closing.

- 057           iii. Participants in the study will also be able to use Facebook as a means of contacting the  
058 staff by sending a private message (email) to the staff. This method may be useful to the  
059 nutrition and health group in which participants will be given a choice to their preferred  
060 method of contact (email, phone, Facebook private message).

061  
062 **3) Participant Posting**

- 063           a. The study will set up its account as a page therefore it will not be a private group. Therefore the  
064 study will only post study information (press releases, articles, etc.) and site information. We  
065 will not post pictures or study participant information. However participants whom are on  
066 Facebook will be allowed to post to the study page. All posts will be reviewed by the study staff  
067 to ensure no other participants are identified as being a part of the study.  
068

069 **Informed Consent**

070  
071 Signed informed consent will be obtained from each subject. Consent will be obtained by study coordinator,  
072 interventionists, and testing staff. Participants will be consented at screening visit one (SV1). Upon arrival  
073 each potential subject will meet with a staff member to review the study consent form. No study specific  
074 procedures will be done prior to the signing of the consent form. Staff members administering the informed  
075 consent must use the following steps in order to orient the potential subject to the purpose of the research.

- 076           • The staff member will verbally explain the study to the potential subject, providing all pertinent  
077 information (purpose, procedures, risks, etc.), and will allow the potential subject ample opportunity to  
078 ask questions.  
079           • Following this verbal explanation, the potential subject will be provided with the consent form and  
080 schedule to review. The potential subject will be given as much time as they need to consider whether or  
081 not to participate in the research.  
082           • After allowing time for the potential subject to read the consent form, the staff member, will meet with  
083 the potential subject to answer any additional questions he/she may have.  
084           • Once the potential subject has all of their questions answered and has agreed to participate, they will be  
085 asked to sign and date the consent form. The staff member will also sign and date the consent.  
086           • A copy of the informed consent will be made and given to the subject.

087 In the event a person wishes to discuss the study with a family member or would like additional time to think  
088 about participating in the study, the staff member will make a note of this in the subject file and the staff will  
089 follow-up with the potential subject.

090 Once a person has completed the screening appointment and the data has been entered into study website the  
091 project manager will randomize the subject by selecting the randomization program in the WE-CAN website.  
092 Participants will be placed into either the diet & exercise group or the attention control (nutrition & health)  
093 group.

094 **Safety Monitoring Plan**

095 An internal safety committee has been established to monitor participant safety and to evaluate the progress of  
096 the study. In addition NIAMS has selected a DSMB to monitor study safety and progress.

## Adverse Event and Serious Adverse Event Collection and Reporting

Adverse Event (AE) - An AE is any unfavorable and unintended diagnosis, sign (including an abnormal laboratory finding), symptom, or disease temporarily associated with the study intervention, which may or may not be related to the intervention, including excessive delayed onset muscle soreness (DOMS) as some minimal muscle soreness will be expected after the training session. AEs include any new events not present during the pre-intervention period or events that were present during the pre-intervention period which has increased in severity. Participants will be asked if any events have occurred on a monthly basis prior to their intervention class and at each testing session. Participants will be encouraged to report AEs as they occur.

Study staff will report non-serious adverse events (related and unrelated to the study) to site project manager and principal investigator within 7 days of notification of the event and will be reported to the coordinating center quarterly. Testing staff will inquire about adverse events prior to testing to ensure there are no unreported events. The site physician/PA will review non serious adverse events (AE) on a weekly basis. Non serious adverse events will be included in the NIAMS safety report and submitted bi-annually.

Serious Adverse Event (SAE) - An SAE is any untoward medical occurrence that results in death, is life-threatening, requires or prolongs hospitalization, causes persistent or significant disability/incapacity, results in congenital anomalies/birth defects, or, in the opinion of the investigators, represents other significant hazards or potentially serious harm to research participants or others.

Staff will report serious adverse events (related and unrelated to the intervention) to the site project manager, principal investigator, and study physician. The clinical site will reports SAEs to the coordinating center within 24 hrs of notification. SAEs will be reported to NIAMS within 24 hours of being reported to the PI (within 48 hours of initial report). The WFU IRB does not require the reporting of adverse events unless it is serious, unexpected and related to the study. Follow-up information will be provided to the PI, DSMB/Safety Officer, and IRB, as appropriate.

NIAMS has assigned a Data Safety Monitoring Board (DSMB) or safety monitor to monitor all aspects of the study.

The DSMB/Safety Monitor will have the following charges:

- To review the entire study protocol, the operations manual, and the informed consent and assent forms for recruitment, randomization, intervention, participant safety, data management, auditing plans for participant records, and quality control and analysis plans, and to identify needed modifications.
- To review data related to efficacy, recruitment, randomization, compliance, retention, protocol adherence, trial operating procedures, forms completion, intervention effects, gender and minority inclusion, and participant safety over the course of the trial.
- To identify problems related to safety over the course of the study and to report them in writing to the PIs, who will ensure that the appropriate individuals receive the report.
- To identify a need for additional data relevant to safety and to request them from investigators.
- To propose appropriate analyses and periodically review developing data on safety and endpoints.
- To make recommendations regarding recruitment, intervention effects, retention, compliance, safety, and continuation of the study.
- To send the Program Administrator and PIs written reports following each DSMB meeting, addressing all issues raised, and subsequently sent to the IRB.
- At any time, the DSMB may recommend discontinuation of any component/intervention of the study for any of the following reasons:

- 142 1) Compelling evidence from this or any other study of an adverse effect sufficient to override any potential  
 143 benefit of the interventions to the target population.  
 144 2) Compelling evidence from this or any other study of a significant beneficial effect whose continued denial to  
 145 other study group(s) would be unethical.  
 146 3) A very low probability of addressing the study hypothesis within a feasible time frame.

## 147 **Statistical Considerations**

### 149 ***Data Management***

150 The Data Management Group, part of the Coordinating Center, has primary responsibility for randomization  
 151 and analyzing data generated by the clinical centers. Data will be collected on hard-copy forms at each site and  
 152 transformed to an electronic database. Our web-based management system will assure integrity and validity.  
 153 Dynamic reports and periodic statistical analyses will monitor quality. A participant-based inventory system  
 154 will track recruitment, retention, adherence, and missing data from entry through exit, close-out, and lock-down  
 155 of final datasets. Our team developed a similar database for the IDEA and START studies.

### 156 ***Statistical Analyses***

157 Statistical analyses will be conducted according to intention-to-treat principles using SAS.

### 158 ***Primary Aim.***

159 The primary hypothesis of long-term reduced WOMAC pain at 18 months will be tested based on a two-tailed  
 160 significance level of 0.05 using contrast statements from a repeated measures mixed linear model with time (6,  
 161 18 mos), randomization arm (D+E vs control), and the interaction, which adjusts the means at each time point  
 162 for potential missing data bias (Laird and Ware). Intervention-effect estimates will be further adjusted for  
 163 baseline pain values, BMI, county, and gender; analysis will match design, so the variance estimate will not be  
 164 biased. Participant ID number will be included as a random effect to control for within-subject variability, and  
 165 the longitudinal model will use an unstructured covariance matrix. In the unlikely event the model does not  
 166 converge, a first-order autoregressive (AR[1]) covariance structure will be fit instead. Maximum-likelihood  
 167 techniques will estimate parameters, as in the IDEA trial (Messier et al). Preliminary analyses will be conducted  
 168 to check the shape of the distributions and variances between groups and as a function of the covariates.  
 169 Regression diagnostics and residual plots will help to find appropriate transformations, if necessary. We will  
 170 include exploratory analyses of subgroups, defined by gender, age (<70 vs ≥70 years), baseline BMI (27.0-34.9,  
 171 35-44.9, ≥45 kg/m<sup>2</sup>), county, and race to determine any differential pain responses.

### 172 ***Secondary Aims***

173 Repeated measures mixed linear models similar to Aim 1 will be used to analyze WOMAC function, 6-minute  
 174 walk, and SF-36 physical subscale. Each outcome will be modeled separately, and 18-month effectiveness will  
 175 be tested based on a two-tailed significance level of 0.05. The model will include the fixed effects study arm,  
 176 time, time-group interaction, county, gender, baseline BMI, and baseline values of the outcome; participant ID  
 177 number will be included as a random effect, and an unstructured covariance will be used assuming model  
 178 convergence is not a problem (AR[1] otherwise). Preliminary analyses will be conducted to check the shape of  
 179 the distributions and variances between groups and as a function of the covariates. Regression diagnostics and  
 180 residual plots will help to find appropriate transformations, if necessary.

### 181 ***Missing Data***

182 If missing data are related to outcomes, our results could be biased. Our models will include variables from  
 183 previous visits determined to predict loss to satisfy Little and Rubin's conditions for data considered missing at  
 184 random (MAR). If "informative censoring" occurs, we will compare analyses using subjects with complete  
 185 data, multiple imputations, or explicit modeling of the censoring mechanism (Conaway, 1993, Wu and Bailey,  
 186 1989).

**Primary Outcomes**

*Aim 1.* A total sample of 820 (410/group) will provide 94% statistical power to detect differences  $\geq 15\%$  in pain

at the 2-sided 0.05 significance level with 80% retention (2-sample t-test, Nquery Advisor). Based on ADAPT (Messier et al). The D+E group in IDEA reduced pain by an average of 51%. This approach utilizes the conditional variance approach of Borm et al. for the

**Table 2: Detectable absolute and relative (%) differences for secondary outcomes, n = 410/group, 80% retention, 85% statistical power,  $\alpha = 0.05$ . Correlation between baseline and 18M values is  $\rho$ .**

| Variable                     | Anticipated 18m Control mean* | Standard Deviation | $\rho$ | D+E Mean (% change from C) |
|------------------------------|-------------------------------|--------------------|--------|----------------------------|
| WOMAC Function               | 17.5                          | 11.5               | 0.6    | 15.3 (-12.3%)              |
| Mobility: 6-Minute Walk (m)  | 509                           | 90.7               | 0.7    | 524 (3.0%)                 |
| SF-36 Physical Score (0-100) | 42.0                          | 10.1               | 0.5    | 44.1 (4.9%)                |

estimation of power for ANCOVA models using group standard deviation  $\sigma = 3.50$ , Pearson correlation between baseline and 18-month pain score of  $\rho = 0.4$  for a conditional standard deviation  $\sigma_c = \sqrt{1 - \rho^2} \times \sigma$ , and 18-month treatment WOMAC pain means  $\sim D+E = 5.03$  vs E-only control = 5.92 ( $\Delta = -0.887$ ). Variations of anticipated power due to modifications in retention and treatment effect are presented in

**Table 1: Power estimates for WOMAC pain, assuming baseline N=820, correlation between BL and 18 months=0.4, and common group SD = 3.50.**

| 18 month Control Mean WOMAC Pain | 18 Month D+E WOMAC Pain (% difference from Control) | 18-Month Retention |     |     |     |
|----------------------------------|-----------------------------------------------------|--------------------|-----|-----|-----|
|                                  |                                                     | 70%                | 75% | 80% | 85% |
| 5.92                             | 5.15 (13%)                                          | 81%                | 84% | 86% | 88% |
|                                  | 5.03 (15%)                                          | 91%                | 92% | 94% | 95% |
|                                  | 4.91 (17%)                                          | 96%                | 97% | 97% | 98% |

Table 1. Correlation between baseline and 18 month pain values are estimated from the IDEA trial, while anticipated

treatment effects and standard deviation for pain were obtained using weighted averages of D+E and non-D+E treatments from the ADAPT and IDEA studies, with some attenuation of the anticipated treatment effect due to the pragmatic nature of WE-CAN (Table 1).

**Secondary Outcomes**

*Aim 2.* Our sample size provides a moderate effect size of 0.234 at 85% power with relevant detectable differences. However, all estimates from IDEA and ADAPT were collected under rigorously controlled conditions; therefore the estimates for the pragmatic trial are conservative. We assume in Table 8 a total baseline sample size of N=820, 80% retention at 18 months, and a 0.05 level of significance for all tests. The detectable and % differences from control aim to achieve 85% power. The mean differences in WOMAC function for D+E compared to D only and E only in IDEA were -3.3 and -4.3, respectively. Likewise, the differences in 6-minute walk distance for the D+E group versus D only in IDEA and ADAPT (41.5 and 42.1, respectively) indicate that the mean difference to achieve 85% power (15.2 m) is modest. IDEA indicated that SF-36 physical subscale was significantly improved in the D+E arm, with an observed difference of 2.8 compared to E alone (Table 2).

234 **Clinical Protocol Synopsis**

235  
236 **Weight loss and Exercise for Communities with Arthritis in North Carolina (WE-CAN)**

237  
238  
239 **Principal Investigators**

240 Stephen P. Messier, Ph.D. J.B. Snow Biomechanics Laboratory, Health and Exercise Science, Wake Forest  
241 University

242 Leigh F. Callahan, Ph.D. Thurston Arthritis Research Center, University of North Carolina at Chapel Hill

243  
244  
245 **Co-Investigators**

246 Daniel Beavers, Ph.D. Department of Biostatistics and Data Science, Wake Forest University School of  
247 Medicine

248 Kate Queen, M.D. Haywood Regional Medical Center

249 Shannon Mihalko, Ph.D. Health and Exercise Science, Wake Forest University

250 Gary Miller, Ph.D., R.D. Health and Exercise Science, Wake Forest University

251 Elena Losina, Ph.D., Orthopedic and Arthritis Center for Outcomes Research, Department of Orthopedic  
252 Surgery, Brigham and Women's Hospital, Harvard Medical School

253 Jeffrey N. Katz, M.D. Orthopedic and Arthritis Center for Outcomes Research, Department of Orthopedic  
254 Surgery, Brigham and Women's Hospital, Harvard Medical School

255 Richard Loeser, M.D. Division of Rheumatology, University of North Carolina at Chapel Hill

256 Paul DeVita, Ph.D. Department of Kinesiology, East Carolina University

257 David Hunter, M.D. Rheumatology Department, University of Sydney

258 Jovita J. Newman, M.S. J.B. Snow Biomechanics Laboratory, Health and Exercise Science, Wake Forest  
259 University

260 Sara A. Quandt, Ph.D. Department of Epidemiology and Prevention, Wake Forest University School of  
261 Medicine

262 Mary F. Lyles, M.D. Section on Gerontology and Geriatric Medicine, Wake Forest University School of  
263 Medicine

264 Joanne M. Jordan, M.D. Thurston Arthritis Research Center, University of North Carolina at Chapel Hill

265  
266  
267 **Funding**

268 National Institute of Arthritis and Musculoskeletal and Skin Diseases (NIAMS)

270

## 16. Clinical Protocol Synopsis

The clinical protocol is detailed in the Research Plan, Appendices, and the Manual of Operations (Appendix G). Below is a synopsis of these procedures.

### Trial Organization

The organizational structure, committees, and committee meeting schedules are detailed in Appendix C and in the Manual of Operations (Appendix G). Briefly, there will be three intervention centers, Forsyth, Johnston, and Haywood counties in North Carolina and a Coordinating Center at Wake Forest Health Sciences in Forsyth County. The intervention will be delivered at 3 sites in Forsyth County, 2 sites in Johnston County, and 1 site in Haywood County. The Coordinating Center, which includes the Data Management group, oversees the day-to-day operation of the trial including heading recruitment, randomization, analyzing data, organizing training sessions, coordinating central resources, providing reports to the DSMB, and collaborating for manuscript preparation describing trial results. The Executive Committee (PIs, site PIs, ad hoc member), with input from the co-investigators, is responsible for major policy decisions that govern the conduct of the trial.

### Description of study population:

Participants will be 820 ambulatory, community-dwelling, overweight and obese ( $BMI \geq 27 \text{ kg/m}^2$ ) men and women aged  $\geq 50$  yrs who meet the American College of Rheumatology clinical criteria for knee OA, which includes knee pain on most days of the week plus at least 3 of the following 6: age  $\geq 50$  years; stiffness  $< 30$  min/day; crepitus, bony tenderness; bony enlargement; no palpable warmth.

### Sampling, recruitment, and enrollment plans.

Recruitment goals for each county were based on previous recruitment successes and population densities; Forsyth, Johnston and Haywood Counties' recruitment goals are 450, 220, and 150, respectively (total = 820). We exceeded our goals in Forsyth County for FAST (209 randomized with a goal of 200), ADAPT (316 with a goal of 300), and IDEA (454 with a goal of 450); in Johnston County we have a history of successful recruitment for a range of intervention studies (see preliminary studies); in Haywood County Dr. Queen has successfully recruited participants for collaborative studies with Drs. Jordan and Callahan (e.g. 23 randomized in 30 days). Yields (number randomized/number of inquiries) were 10%, 14%, and 15%, for FAST, ADAPT, and IDEA, respectively. With fewer exclusion criteria in WE-CAN, we conservatively estimate an average yield of 15%. A web-based data tracking system will monitor recruitment strategies in each county.

We use overlapping recruitment strategies and a monitoring system that provides feedback regarding the effectiveness and cost of each. Forsyth County will use mailings, local newspaper ads, and Wake ONE, the Wake Forest Baptist Hospital patient database. We also have strong ties with local aging service networks and access to senior centers, senior high-rise residential sites, churches, and a large database of older adults who have signed consent to be contacted about participating in future clinical trials. UNC has a similar relationship with Johnston County, where Dr. Jordan has ready access to a large segment of the population, many who have signed consent to be contacted for future studies. The most successful recruitment methods for clinical trials in the county have been through the Johnston County Health System, primary care offices, local newspapers, the Seniors Guide, a Parks and Recreation Brochure, the newsletter for the Town of Clayton, and the Clayton Community Center. Dr. Queen and Drs. Jordan and Callahan have collaborated on several trials. Methods of recruitment in Haywood include community talks, Dr. Queen's practice (12 physicians), newspaper ads, local orthopedic groups, MedWest Fitness Center, and the Outpatient Rehab Center.

### Process for obtaining informed consent.

Upon arrival each potential subject will meet with a staff member to review the study consent form. No study specific procedures will be done prior to the signing of the consent form. Staff members administering the

324 informed consent must use the following steps in order to orient the potential subject to the purpose of the  
325 research.

- 326 • The staff member will verbally explain the study to the potential subject, providing all pertinent  
327 information (purpose, procedures, risks, benefits, alternatives to participation, etc.), and will allow the  
328 potential subject ample opportunity to ask questions. The following points will be covered.
  - 329 ○ *Study Purpose:* We are studying the effects of weight loss and exercise on arthritis symptoms.
  - 330 ○ *Study Description:* There will be two equal groups, one group will attend 2 group and 2  
331 individual sessions per month in the first 6 months, followed by a monthly group and individual  
332 session for the following 6 months, and lastly monthly group classes for the remaining 6 months.  
333 In addition you will attend an exercise class 2x/week. You will be asked to exercise at home  
334 1x/week. The attention control group will attend successful aging classes and will perform  
335 stretching exercises. They will meet 4 times over the course of the study and will receive  
336 informational packets, webinars, texts, and emails for each of the other months. At the start of  
337 the study they will be asked to select their preferred mode of contact (phone, email, study  
338 website, or text messages), and information will be distributed accordingly. The tests involved  
339 with the study include a physical exam, walking and strength tests, and questionnaires.
  - 340 ○ *Risks:* There are some risks associated with the study including: muscle/joint soreness or falling  
341 during the walking and strength training; and breach of personal information. The study staff will  
342 take the following measures to minimize these risks: testing areas will be reviewed prior to  
343 testing/training to ensure there are no obstacles in the way that may cause a trip/fall;  
344 participants will be trained on proper strength training and stretching techniques; and all records  
345 will be kept in secure locations in which only authorized persons will have access.
  - 346 ○ *Benefits:* Researchers believe that exercise and weight loss are important in relieving the  
347 symptoms of OA; however, because people respond differently, no one can know in advance if  
348 it will help in your particular case.
  - 349 ○ *Alternatives:* You do not have to participate to receive treatment. You do have the option of  
350 being treated with conventional medical therapy or participate in a community lifestyle program.
- 351 • Following this verbal explanation, the potential subject will be provided with a written consent form to  
352 review. The potential subject will be given as much time as needed to consider whether or not to  
353 participate in the research.
- 354 • After allowing time for the potential subject to read the consent form, the staff member, will meet with  
355 the potential subject to answer any additional questions s/he may have.
- 356 • The staff member will also ask the potential subject questions to ensure the potential subject  
357 understands the study (including purpose, risks, benefits, and alternatives) and does not have any  
358 additional questions.

### 359 **Approaches used for retention, cooperation, and follow-up.**

360 WE-CAN's design evolved from Social Cognitive Theory (SCT), group dynamics, and over two decades of  
361 weight management and exercise trial experience. Our 18-month FAST, ADAPT, and IDEA trials had 80%-  
362 88% retention (i.e., returned for final testing visit) and 64-70% adherence (i.e., attendance to exercise and  
363 weight loss classes).

364 Drs. Mihalko and Callahan will train WE-CAN community interventionists in standardized and validated  
365 behavioral techniques based on a SCT framework to enhance adherence. They include regular contact during  
366 the intervention; positive feedback; establishing personal commitment to the project; promoting a sense of  
367 community via study logo, cards, and newsletters; and developing self-efficacy, outcome expectations, and  
368 self-regulatory skills. From the outset, the importance of regular attendance will be emphasized and data will  
369 be reviewed regularly to identify those who need additional reminders and/or counseling.

370 Our toolbox approach tailors the intervention to participant needs. Each strategy identifies a problem and tests  
371 a solution for a specific period. If the problem is resolved, the strategy is continued until behavior change is  
372 consistent. If not, a new strategy is selected and tested for a specific period. Some can be used in groups,  
373 while others require one-on-one interaction via telephone or face-to-face meeting. For example, if a participant  
374  
375



misses 2 consecutive sessions and has had no contact with the interventionist, a phone session will be scheduled. The interventionist will assess the participant's study goals, time management, care-giving concerns, and feelings of connectedness to group objectives. Together, they will develop a specific plan. Adherence rates will be regularly reviewed with the Adherence and Retention Committee. Site-specific adherence rates and barriers to participation will be discussed and strategies to promote adherence reviewed. *Our team has had remarkable success with this tiered approach; adherence and retention rates have exceeded study goals on numerous federally funded projects examining weight loss and exercise interventions.*

**A description and justification for selection of the dose, frequency, and administration of the intervention.**

The weight loss goal of the D+E group is a minimum of 10% of baseline body weight, as recommended by the National Institutes of Health for overweight and obese adults and is consistent with our results in IDEA (1) in which an 11.4% weight loss, when combined with exercise, reduced knee pain by 51%. The attention control (C) group is modeled after our previous studies' attention control groups, providing attention, social interaction, and health education (2, 27) The dietary plan is characterized by the frequency of contacts, methods to induce dietary restriction, and behavioral therapy strategies. For the first 6 months, the plan will be based on an energy-restricted diet using 1 to 2 partial meal replacements (GNC®) per day with options to incorporate 1 meal replacement per day during months 7-18. The plan will be individualized and based on the highly successful program used in IDEA. Based on IDEA, most participants will reach their weight loss goal after 9 months. Once the weight loss goal is achieved an individual may either begin weight maintenance, or may continue to lose additional weight using safe and healthy nutrition practices.

The exercise component of the D+E intervention will include 60-minute sessions 3 days per week (d/wk) for 18 months. During the first 4 months, participants will exercise 2 d/wk at one of the designated community facilities and 1 d/wk on their own (at home or community facility). Any time afterward, those wishing to exercise on their own every day will alternate between the facility and on their own during a 2-month transition phase. Based on IDEA, we expect most will choose to maintain the combination of facility and home based exercise. The exercise program prescribed to each participant will consist of aerobic (15 min), resistance-training (20 min), a second aerobic (15 min), and cool-down (10 min) phases. Strength training is particularly relevant to offset any loss of muscle and bone mass resulting from weight loss. In addition to the 3 scheduled days, participants will be encouraged to exercise most other days of the week on their own. This protocol is consistent with the American College of Sports Medicine guidelines for exercise for older adults (38). Monthly exercise logs will be used to monitor progress.

**A description of the each enrollment site and how data from each site will be obtained, managed, and protected.**

Clinical Centers will be established in Forsyth (3 intervention sites), Johnston (2 intervention sites), and Haywood (1 intervention site) Counties. Each clinical center consists of a team of investigators and staff who provide the areas of expertise necessary for the successful completion of the WE-CAN protocol. Each center will have a Site-PI, a Site-Project Manager, a research technician, and two community interventionists that will be crossed trained to lead the nutrition classes, the exercise classes, and organize and run the attention control group. These personnel will provide the expertise necessary for the successful completion of the protocol. Clinical Center site responsibilities include:

1. Recruiting participants for the trial;
2. Confirming eligibility of all participants;
3. Implementing the interventions in a systematic and standardized fashion consistent with the study protocol;
4. Making provisions to ensure the safety of trial participants;
5. Collection of data according to the study protocol;
6. Entering and uploading data to study database;

- 430 7. Collaborating in design and monitoring of the study;  
 431 8. Collaborating in the analysis and dissemination of study results;  
 432

433 The Data Management Group, part of the Coordinating Center, has primary responsibility for randomization  
 434 and analyzing data generated by the clinical centers. Data will be collected on hard-copy forms at each site  
 435 and transferred to an electronic database. Our web-based management system will assure integrity and  
 436 validity. Dynamic reports and periodic statistical analyses will monitor quality. A participant-based inventory  
 437 system will track recruitment, retention, adherence, and missing data from entry through exit, close-out, and  
 438 lock-down of final datasets. Our team developed a similar database for the IDEA and START studies.  
 439

440 Confidentiality of enrolled person's data will be protected. Data will be maintained in locked file cabinets and on  
 441 password protected computer files. Data will only be accessible by the PI and his/her staff at the intervention  
 442 site, and by those who are providing services for this research project or are responsible for overseeing  
 443 research (i.e. WFUHS statisticians, IRB).  
 444

#### 445 **A description of all clinical and behavioral tests to enable the research question to be answered.**

446  
 447 The Likert version of the Western Ontario McMasters Universities Osteoarthritis Index (WOMAC) will be used  
 448 to measure **pain (primary outcome)** on a scale from 0 (none) to 4 (extreme). The pain subscale consists of 5  
 449 items, and total scores range from 0-20; higher scores indicate greater dysfunction. The  
 450 Osteoarthritis Research Society International supports the validity of this instrument and recommends it as the  
 451 health status measure of choice in older adults with knee OA. The **WOMAC function subscale** is also 0-4 and  
 452 queries the degree of difficulty experienced in the last 48 hours due to knee OA. Individual scores for the 17  
 453 items are totaled to generate a summary score from 0-68; higher scores indicate poorer function (39). Other  
 454 secondary measures are noted in the table below.  
 455

| Table. Measurements with screening and follow-up visit schedule                                   |     |     |     |      |      |                                                                                      |
|---------------------------------------------------------------------------------------------------|-----|-----|-----|------|------|--------------------------------------------------------------------------------------|
| Measurements                                                                                      | PSV | SV1 | FU6 | FU12 | FU18 | Explanation                                                                          |
| <b>Questionnaires</b>                                                                             |     |     |     |      |      |                                                                                      |
| Informed Consent                                                                                  |     | x   |     |      |      |                                                                                      |
| Eligibility Questionnaire                                                                         | x   |     |     |      |      | To determine eligibility                                                             |
| Medical History                                                                                   | xc  | x   | x   | x    | x    | For eligibility and to document changes in health                                    |
| Comorbidities Questionnaire                                                                       |     | x   | x   | x    | x    | (40)                                                                                 |
| Randomization                                                                                     |     | x   |     |      |      |                                                                                      |
| WOMAC                                                                                             |     | x   | x   | x    | x    | Pain is primary and function secondary outcomes                                      |
| Cost Effectiveness                                                                                |     | x   | x   | x    | x    | See section c.4.9. for details                                                       |
| PASE scale                                                                                        |     | x   | x   | x    | x    | Physical Activity Scale for the Elderly (28, 41)                                     |
| MOCA                                                                                              |     | x   |     |      | x    | Montreal Cognitive Assessment, (42, 43)                                              |
| EuroQol Quality of Life(EQ5D)                                                                     |     | x   | x   | x    | x    | Quality of life measure (44)                                                         |
| Work History Resource                                                                             |     | x   | x   | x    | x    | Visits to clinicians, tests, medications, injections, surgery, alternative therapies |
| Work Productivity and Activity Impairment Index                                                   |     | x   | x   | x    | x    | assesses absenteeism and presenteeism (45)                                           |
| DHQ II                                                                                            |     | x   | x   | x    | x    | NIH Diet History Questionnaire (36, 37)                                              |
| SF-36                                                                                             |     | x   | x   | x    | x    | Health related quality of life (physical, mental) (46)                               |
| Self-Efficacy-Adherence                                                                           |     | x   | x   | x    | x    | Belief can exercise at various intensities (47)                                      |
| Demographics                                                                                      |     | x   |     |      |      |                                                                                      |
| Medication form                                                                                   |     | x   | x   | x    | x    | Atherosclerosis Risk in Communities form (48)                                        |
| Adverse Events                                                                                    |     |     | x   | x    | x    | Also collected as they occur                                                         |
| <b>Physical Performance Tests/Knee Exam</b>                                                       |     |     |     |      |      |                                                                                      |
| Height                                                                                            | xc  | x   |     |      |      | To determine BMI                                                                     |
| Weight                                                                                            | xc  | x   | x   | x    | x    | To determine BMI                                                                     |
| Knee exam                                                                                         |     | x   |     |      |      | To determine eligibility                                                             |
| 6 minute walk                                                                                     |     | x   | x   | x    | x    | Measure of mobility (49)                                                             |
| Short Physical Performance Battery (SPPB)                                                         |     | x   | x   | x    | x    | Gait speed, sit to stand, balance tests; predicts disability (50)                    |
| Functional Leg Strength                                                                           |     | x   | x   | x    | x    | Sit to stand test, part of SPPB                                                      |
| xc = brief screen by self-report, PSV = Prescreening Visit. SV = screening visit. FU = follow-up. |     |     |     |      |      |                                                                                      |

456  
 457 **Provide evidence of the ability of each center to enroll the proposed numbers, adhere to the protocol,**  
 458 **collect and transmit data, and operate within the organizational structure.**  
 459

Recruitment goals for each county were based on previous recruitment successes and population densities; Forsyth, Johnston and Haywood Counties' recruitment goals are 450, 220, and 150, respectively (total = 820). We exceeded our goals in Forsyth County for FAST (209 randomized with a goal of 200), ADAPT (316 with a goal of 300), and IDEA (454 with a goal of 450); in Johnston County we have a history of successful recruitment for a range of intervention studies (see preliminary studies); in Haywood County Dr. Queen has successfully recruited participants for collaborative studies with Drs. Jordan and Callahan (e.g. 23 randomized in 30 days). Yields (number randomized/number of inquiries) were 10%, 14%, and 15%, for FAST, ADAPT, and IDEA, respectively. With fewer exclusion criteria in WE-CAN, we conservatively estimate an average yield of 15%. A web-based data tracking system will monitor recruitment strategies in each county.

A number of strategies are used to enhance adherence. They include regular contact during the intervention; positive feedback; establishing personal commitment to the project; promoting a sense of community via study logo, cards, and newsletters; and developing self-efficacy, outcome expectations, and self-regulatory skills. From the outset, the importance of regular attendance will be emphasized and data will be reviewed regularly to identify those who need additional reminders and/or counseling.

Our toolbox approach tailors the intervention to participant needs. Each strategy identifies a problem and tests a solution for a specific period. If the problem is resolved, the strategy is continued until behavior change is consistent. If not, a new strategy is selected and tested for a specific period. Some can be used in groups, while others require one-on-one interaction via telephone or face-to-face meeting. For example, if a participant misses 2 consecutive sessions and has had no contact with the interventionist, a phone session will be scheduled. The interventionist will assess the participant's study goals, time management, care-giving concerns, and feelings of connectedness to group objectives. Together, they will develop a specific plan. Adherence rates will be regularly reviewed with the Adherence and Retention Committee. Site-specific adherence rates and barriers to participation will be discussed and strategies to promote adherence reviewed. *Our team has had remarkable success with this tiered approach; adherence and retention rates have exceeded study goals on numerous federally funded projects examining weight loss and exercise interventions.*

Adherence to scheduled testing visits, exercise sessions, and nutrition classes (both face-to-face and by other means) will all be monitored by the Coordinating Center staff. Attendance data will be uploaded to an electronic database monitored by the Data Management Group of the Coordinating Center. Coordinating Center staff will review, at regular 2-week intervals, recent participant attendance and completeness of data collection at each site. These reports will be submitted to the Data and Safety Monitoring Board.

### **Training Study Personnel.**

Coordinating Center personnel will provide **on-site training** for the community interventionists during the 6-month planning period (and during the course of the trial for newly hired leaders) and tailor the instruction to the local facilities. For example, some exercise facilities will have indoor tracks conducive to walking, while others with less space may use treadmills, elliptical trainers, or low-impact aerobic dance. Some facilities may have a full kitchen for nutrition classes, while others may have no kitchen facilities in meeting rooms.

**Tailoring the intervention to each facility and employing and training people from the local community supports our pragmatic study design.** Following the initial training sessions, the Coordinating Center's interventionist team will monitor the progress of each site via bi-weekly WebEx meetings with our psychologist, examining adherence rates and barriers to participation, noncompliant participants, and strategies that have proved successful. These core values are consistent, effective mediators for translating knowledge into practice.

### **Demonstration of availability of study agents.**

We have entered into an agreement with Dr. Guru Ramanathan, Chief Innovation Officer at GNC, to supply the meal replacements at a reduced cost (see letter of support). We have a long history of working with Dr. Ramanathan and GNC as suppliers of the same meal replacement product used for IDEA.

## Quality Management Plan

### 1.A. Standard Operating Procedures (SOPs)

The Coordinating Center will be responsible for the distribution and training of SOPs. The date research staff has been trained will be documented. Research staff will be monitored consistently and receive refresher training at regular intervals to ensure compliance. SOPs will be reviewed annually to reassess applicability.

### 1.B. Data and Form Checks

Once the subject is finished completing the forms, the forms will be checked for accuracy. The tester will check to see if each question has been completed correctly such as no double responses, dates are correct (for example birth year is entered vs. current date), etc. The tester will also ensure that there are no skipped responses or missed pages. If a response(s) or page is empty the tester will have the subject complete that question(s) or page. If an error (such as date seems incorrect) is found the tester will ask the subject to verify the response and if incorrect the subject should put a line through the incorrect response and initial next to it and then write in the correct response.

All forms should be completed in their entirety. If a form cannot be completed the tester should write the reason as to why the form couldn't be completed (such as participant refused to answer question) and should initial and date next to the missing item.

All persons will be trained on how to access the website and on how to enter forms. New users will undergo a training period in which they will be given duplicate paper forms to enter into the website on separate occasions. The error rate will be calculated and if not acceptable (error rate must be  $\leq .05\%$ ) the user will repeat the process until the error rate is deemed acceptable. In addition, if a user's error rate was previously deemed acceptable and becomes unacceptable at a later period they will be retrained and will have to repeat the training process.

### 1.C. Double Data Entry

Paper forms will be entered into 2 separate data bases and compared. Error reports displaying conflicting entries will be given to the project manager who will have the research technician pull the paper form to verify the correct response and edit the record within the website.

Edits are performed by retrieving the current record for editing in the same web form in which it was submitted. Upon resubmission, all of the current validation rules and message are reapplied to the edited data as describe above for the original entry.

### 1.D. Clinical Monitoring

Regular site visits will be scheduled for all clinical centers regardless of performance, to ensure that developing problems are detected early, that activities are consistent across centers, and that successful implementation strategies are shared. Clinic staff will receive central training, and re-training in the study protocol. Site monitoring will take place through semi-annual site visits conducted by the coordinating center. The coordinating center will perform an initiation visit prior to the recruitment of subjects to assist with training, periodic monitoring visits (to ensure sites are maintaining the and following the study protocol), and a close out visit.

#### 1.D.1. Initial Visit

During the site initial visit the clinical center study team will receive adequate training from the Coordinating Center. This visit will occur after the site has completed all regulatory requirements and has obtained IRB approval for the research study at their site.

Other topics of discussion during the site initiation visit include:

- Study overview, eligibility criteria, procedures, and recruitment
- Review of SOPs (examples include: Informed consent requirements, IRB obligations, adverse event reporting)
- Data forms review

- Regulatory documents and study file organization

#### 1.D.2. Periodic Monitoring Visits

The administrative group of the coordinating center staff will perform semi-annual monitoring visits. The focus of these visits is to evaluate the way the study is being conducted and to perform source document verification. Documents will be verified to ensure:

- Informed consent has been obtained and documented in accordance with IRB regulations
- All information recorded on the forms is complete and accurate or if missing is noted.
- That all Adverse Event (AE) and Serious Adverse Event (SAE) forms have been submitted

Once the site visit is complete, feed- back will be provided to the site project manager and site PI for any issues that may have been discovered during the visit. The site will be given a timeline in which the issues should be corrected and reported back to the coordinating center.

#### 1.D.3. Close-Out Visit

Once the study has ended a close-out visit will be performed. Action items during the close-out visit may include:

- Discussing timelines and strategies for the completion of outstanding forms
- Collect outstanding patient data forms and study forms such as the screening and monitoring logs
- Perform a final review of the study file documents
- Discuss the plans for record retention
- Discuss ongoing investigator responsibilities

## 17. References

- 582 1. Messier SP, Mihalko SL, Legault C, Miller GD, Nicklas BJ, Devita P, et al. Effects of intensive diet and  
583 exercise on knee joint loads, inflammation, and clinical outcomes among overweight and obese adults with  
584 knee osteoarthritis: the IDEA randomized clinical trial. *JAMA*. 2013;310(12):1263-73. doi: 1741824  
585 [pii];10.1001/jama.2013.277669 [doi].  
586
- 587 2. Messier SP, Loeser RF, Miller GD, Morgan TM, Rejeski WJ, Sevick MA, et al. Exercise and dietary  
588 weight loss in overweight and obese older adults with knee osteoarthritis: the Arthritis, Diet, and Activity  
589 Promotion Trial. *Arthritis Rheum*. 2004;50(5):1501-10.  
590
- 591 3. Bliddal H, Leeds AR, Stigsgaard L, Astrup A, Christensen R. Weight loss as treatment for knee  
592 osteoarthritis symptoms in obese patients: 1-year results from a randomised controlled trial. *AnnRheumDis*.  
593 2011;70(10):1798-803. doi: ard.2010.142018 [pii];10.1136/ard.2010.142018 [doi].  
594
- 595 4. Koh HK, Blakey CR, Roper AY. Healthy People 2020: A Report Card on the Health of the Nation.  
596 *JAMA*. 2014. doi: 1876599 [pii];10.1001/jama.2014.6446 [doi].  
597
- 598 5. Hart L. The contributions of diet and exercise to improving knee osteoarthritis in overweight adults. *Clin*  
599 *J Sports Med*. 2014;24(2):158-9.  
600
- 601 6. Vos T, Flaxman AD, Naghavi M, Lozano R, Michaud C, Ezzati M, et al. Years lived with disability  
602 (YLDs) for 1160 sequelae of 289 diseases and injuries 1990-2010: a systematic analysis for the Global Burden  
603 of Disease Study 2010. *Lancet*. 2012;380(9859):2163-96. doi: S0140-6736(12)61729-2 [pii];10.1016/S0140-  
604 6736(12)61729-2 [doi].
- 605 7. Losina E, Burbine, Weinstein AM, Reichmann WM, Rome BN, Collins JE, et al. Projecting the Future  
606 Public Health Impact of the Trend Toward Earlier Onset of Knee Osteoarthritis in the Past 20 Years.  
607 *Forthcoming*. 2014.
- 608 8. Hunter DJ, Lo GH. The Management of Osteoarthritis: An Overview and Call to Appropriate  
609 Conservative Treatment. *Medical Clinics of North America*. 2009;93(1):127-+. doi: DOI  
610 10.1016/j.mcna.2008.07.009.
- 611 9. Lewis-Faning E, Fletcher E. Chronic rheumatic diseases: statistical study of 1000 cases of chronic  
612 rheumatism. *Postgraduate Medical Journal*. 1945;21:137.
- 613 10. Felson DT, Anderson JJ, Naimark A, Walker AM, Meenan RF. Obesity and knee osteoarthritis. The  
614 Framingham Study. *AnnInternMed*. 1988;109(1):18-24.
- 615 11. Felson DT, Zhang Y, Anthony JM, Naimark A, Anderson JJ. Weight loss reduces the risk for  
616 symptomatic knee osteoarthritis in women. The Framingham Study. *AnnInternMed*. 1992;116(7):535-9.
- 617 12. Yusuf E, Bijsterbosch J, Slagboom PE, Rosendaal FR, Huizinga TW, Kloppenburg M. Body mass index  
and alignment and their interaction as risk factors for progression of knees with radiographic signs of  
osteoarthritis. *Osteoarthritis Cartilage*. 2011;19(9):1117-22. doi: S1063-4584(11)00160-9  
[pii];10.1016/j.joca.2011.06.001 [doi].

- 618 13. Murphy L, Schwartz TA, Helmick CG, Renner JB, Tudor G, Koch G, et al. Lifetime risk of symptomatic  
619 knee osteoarthritis. *Arthritis Rheum*. 2008;59(9):1207-13. doi: 10.1002/art.24021 [doi].
- 620 14. Messier SP, Legault C, Mihalko S, Miller GD, Loeser RF, Devita P, et al. The Intensive Diet and  
621 Exercise for Arthritis (IDEA) trial: design and rationale. *BMC Musculoskelet Disord*. 2009;10:93.
- 622 15. Fortney JC, Pyne JM, Mouden SB, Mittal D, Hudson TJ, Schroeder GW, et al. Practice-based versus  
623 telemedicine-based collaborative care for depression in rural federally qualified health centers: a pragmatic  
624 randomized comparative effectiveness trial. *Am J Psychiatry*. 2013;170(4):414-25. doi: 1654939  
625 [pii];10.1176/appi.ajp.2012.12050696 [doi].
- 626 16. Gooch K, Marshall DA, Faris PD, Khong H, Wasylak T, Pearce T, et al. Comparative effectiveness of  
627 alternative clinical pathways for primary hip and knee joint replacement patients: a pragmatic randomized,  
628 controlled trial. *Osteoarthritis Cartilage*. 2012;20(10):1086-94. doi: S1063-4584(12)00872-2  
629 [pii];10.1016/j.joca.2012.06.017 [doi].
- 630 17. Schmidt B, Wenitong M, Esterman A, Hoy W, Segal L, Taylor S, et al. Getting better at chronic care in  
631 remote communities: study protocol for a pragmatic cluster randomised controlled of community based  
632 management. *BMC Public Health*. 2012;12:1017. doi: 1471-2458-12-1017 [pii];10.1186/1471-2458-12-1017  
633 [doi].
- 634 18. United States Department of Agriculture. Rural america at a glance: Economic Research Service; 2013  
635 [updated 11/1/2013]. EB-24:[Available from: [http://www.ers.usda.gov/publications/eb-economic-  
636 brief/eb24.aspx#.VARk2mNVqSo](http://www.ers.usda.gov/publications/eb-economic-brief/eb24.aspx#.VARk2mNVqSo)].
- 637 19. National Rural Health Association. What's different about rural health care? : National Rural Health  
638 Association; 2014 [updated 2014]. Available from: <http://www.ruralhealthweb.org/go/left/about-rural-health>.
- 639 20. Campbell PT. Obesity: a certain and avoidable cause of cancer. *Lancet*. 2014;384(9945):727-8. Epub  
640 2014/08/19. doi: 10.1016/s0140-6736(14)61172-7. PubMed PMID: 25129326.
- 641 21. Bhaskaran K, Douglas I, Forbes H, dos-Santos-Silva I, Leon DA, Smeeth L. Body-mass index and risk  
642 of 22 specific cancers: a population-based cohort study of 5.24 million UK adults. *Lancet*. 2014;384(9945):755-  
643 65. Epub 2014/08/19. doi: 10.1016/s0140-6736(14)60892-8. PubMed PMID: 25129328.
- 644 22. Bauer UE, Briss PA, Goodman RA, Bowman BA. Prevention of chronic disease in the 21st century:  
645 elimination of the leading preventable causes of premature death and disability in the USA. *Lancet*.  
646 2014;384(9937):45-52. Epub 2014/07/06. doi: 10.1016/s0140-6736(14)60648-6. PubMed PMID: 24996589.
- 647 23. Thorpe KE, Zwarenstein M, Oxman AD, Treweek S, Furberg CD, Altman DG, et al. A pragmatic-  
648 explanatory continuum indicator summary (PRECIS): a tool to help trial designers. *CMAJ*. 2009;180(10):E47-  
649 E57. doi: cmaj.090523 [pii];10.1503/cmaj.090523 [doi].
- 650 24. Williamson DA, Anton SD, Han H, Champagne CM, Allen R, Leblanc E, et al. Early behavioral  
651 adherence predicts short and long-term weight loss in the POUNDS LOST study. *J Behav Med*.  
652 2010;33(4):305-14. doi: 10.1007/s10865-010-9253-0 [doi].

- 653 25. Heshka S, Greenway F, Anderson JW, Atkinson RL, Hill JO, Phinney SD, et al. Self-help weight loss  
654 versus a structured commercial program after 26 weeks: a randomized controlled study. *AmJ Med*.  
655 2000;109(4):282-7. doi: S0002-9343(00)00494-0 [pii].
- 656 26. Ettinger WH, Jr., Burns R, Messier SP, Applegate W, Rejeski WJ, Morgan T, et al. A randomized trial  
657 comparing aerobic exercise and resistance exercise with a health education program in older adults with knee  
658 osteoarthritis. The Fitness Arthritis and Seniors Trial (FAST). *JAMA*. 1997;277(1):25-31.
- 659 27. Messier SP, Mihalko SL, Beavers DP, Nicklas BJ, Devita P, Carr JJ, et al. Strength Training for Arthritis  
660 Trial (START): design and rationale. *BMC MusculoskeletDisord*. 2013;14(1):208. doi: 1471-2474-14-208  
661 [pii];10.1186/1471-2474-14-208 [doi].
- 662 28. Callahan LF, Mielenz T, Freburger J, Shreffler J, Hootman J, Brady T, et al. A randomized controlled  
663 trial of the people with arthritis can exercise program: symptoms, function, physical activity, and psychosocial  
664 outcomes. *Arthritis Rheum*. 2008;59(1):92-101. doi: 10.1002/art.23239 [doi].
- 665 29. Callahan LF, Cleveland RJ, Shreffler J, Hootman JM, Mielenz TJ, Schoster B. Evaluation of active  
666 living every day in adults with arthritis. *J PhysActHealth*. 2014;11(2):285-95. doi: 2011-0317  
667 [pii];10.1123/jpah.2011-0307 [doi].
- 668 30. Losina E, Walensky RP, Reichmann WM, Holt HL, Gerlovin H, Solomon DH, et al. Impact of obesity  
669 and knee osteoarthritis on morbidity and mortality in older Americans. *AnnInternMed*. 2011;154(4):217-26. doi:  
670 154/4/217 [pii];10.1059/0003-4819-154-4-201102150-00001 [doi].
- 671 31. Health NI. Clinical guidelines on the identification, evaluation and treatment of overweight and obesity  
672 in adults-the evidence report. *ObesRes*. 1998;6:51S-209S.
- 673 32. Pamuk ER, Williamson DF, Madans J, Serdula MK, Kleinman JC, Byers T. Weight loss and mortality in  
674 a national cohort of adults, 1971-1987. *AmJ Epidemiol*. 1992;136(6):686-97.
- 675 33. Harrington M, Gibson S, Cottrell RC. A review and meta-analysis of the effect of weight loss on all-  
676 cause mortality risk. *NutrResRev*. 2009;22(1):93-108. doi: S0954422409990035  
677 [pii];10.1017/S0954422409990035 [doi].
- 678 34. Esposito K, Pontillo A, Di Palo C, Giugliano G, Masella M, Marfella R, et al. Effect of weight loss and  
679 lifestyle changes on vascular inflammatory markers in obese women: a randomized trial. *JAMA*.  
680 2003;289(14):1799-804.
- 681 35. Bauer J, Biolo G, Cederholm T, Cesari M, Cruz-Jentoft AJ, Morley JE, et al. Evidence-based  
682 recommendations for optimal dietary protein intake in older people: a position paper from the PROT-AGE  
683 Study Group. *J AmMed DirAssoc*. 2013;14(8):542-59. doi: S1525-8610(13)00326-5  
684 [pii];10.1016/j.jamda.2013.05.021 [doi].
- 685 36. Subar AF, Thompson FE, Kipnis V, Midthune D, Hurwitz P, McNutt S, et al. Comparative validation of  
686 the Block, Willett, and National Cancer Institute food frequency questionnaires : the Eating at America's Table  
687 Study. *AmJ Epidemiol*. 2001;154(12):1089-99.



- 688 37. Thompson FE, Subar AF, Brown CC, Smith AF, Sharbaugh CO, Jobe JB, et al. Cognitive research  
689 enhances accuracy of food frequency questionnaire reports: results of an experimental validation study. *J*  
690 *AmDietAssoc.* 2002;102(2):212-25.
- 691 38. Chodzko-Zajko WJ, Proctor DN, Fiatarone Singh MA, Minson CT, Nigg CR, Salem GJ, et al. American  
692 College of Sports Medicine position stand. Exercise and physical activity for older adults. *MedSciSports Exerc.*  
693 2009;41(7):1510-30. doi: 10.1249/MSS.0b013e3181a0c95c [doi].
- 694 39. Bellamy N, Buchanan WW, Goldsmith CH, Campbell J, Stitt LW. Validation study of WOMAC: a health  
695 status instrument for measuring clinically important patient relevant outcomes to antirheumatic drug therapy in  
696 patients with osteoarthritis of the hip or knee. *JRheumatol.* 1988;15(12):1833-40.
- 697 40. Sangha O, Stucki G, Liang MH, Fossel AH, Katz JN. The Self-Administered Comorbidity Questionnaire:  
698 a new method to assess comorbidity for clinical and health services research. *Arthritis Rheum.* 2003;49(2):156-  
699 63. doi: 10.1002/art.10993 [doi].
- 700 41. Washburn RA, McAuley E, Katula J, Mihalko SL, Boileau RA. The physical activity scale for the elderly  
701 (PASE): evidence for validity. *JClinEpidemiol.* 1999;52(7):643-51.
- 702 42. Nasreddine ZS, Phillips N, Chertkow H. Normative data for the Montreal Cognitive Assessment (MoCA)  
703 in a population-based sample. *Neurology.* 2012;78(10):765-6. doi: 78/10/765-a  
704 [pii];10.1212/01.wnl.0000413072.54070.a3 [doi].
- 705 43. Nasreddine ZS, Phillips NA, Bedirian V, Charbonneau S, Whitehead V, Collin I, et al. The Montreal  
706 Cognitive Assessment, MoCA: a brief screening tool for mild cognitive impairment. *JAmGeriatrSoc.*  
707 2005;53(4):695-9. doi: JGS53221 [pii];10.1111/j.1532-5415.2005.53221.x [doi].
- 708 44. EuroQol--a new facility for the measurement of health-related quality of life. *Health Policy.*  
709 1990;16(3):199-208.
- 710 45. Reilly MC, Zbrozek AS, Dukes EM. The validity and reproducibility of a work productivity and activity  
711 impairment instrument. *Pharmacoeconomics.* 1993;4(5):353-65.
- 712 46. Ware JE, Jr., Sherbourne CD. The MOS 36-item short-form health survey (SF-36). I. Conceptual  
713 framework and item selection. *MedCare.* 1992;30(6):473-83.
- 714 47. McAuley E, Mihalko SL. Measuring Exercise-Related Self-Efficacy. In: J.L.Duda, editor. *Advances in*  
715 *Sport and Exercise Psychology Measurement.* Morgantown, W.V: Fitness Information Technology, Inc.; 1998.  
716 p. 371-89.
- 717 48. investigators TA. The Atherosclerosis Risk in Communities (ARIC) Study: design and objectives.  
718 *AmJEpidemiol.* 1989;129(4):687-702.
- 719 49. Penninx BW, Messier SP, Rejeski WJ, Williamson JD, DiBari M, Cavazzini C, et al. Physical exercise  
720 and the prevention of disability in activities of daily living in older persons with osteoarthritis. *ArchInternMed.*  
721 2001;161(19):2309-16.

- 722 50. Guralnik JM, Simonsick EM, Ferrucci L, Glynn RJ, Berkman LF, Blazer DG, et al. A short physical  
723 performance battery assessing lower extremity function: association with self-reported disability and prediction  
724 of mortality and nursing home admission. *J Gerontol.* 1994;49(2):M85-M94.
- 725 51. Siegel JE, Weinstein MC, Russell LB, Gold MR. Recommendations for reporting cost-effectiveness  
726 analyses. Panel on Cost-Effectiveness in Health and Medicine. *JAMA.* 1996;276(16):1339-41.
- 727 52. Weinstein MC, Siegel JE, Gold MR, Kamlet MS, Russell LB. Recommendations of the Panel on Cost-  
728 effectiveness in Health and Medicine. *JAMA.* 1996;276(15):1253-8.
- 729 53. Dolan P. Modeling valuations for EuroQol health states. *Med Care.* 1997;35(11):1095-108.
- 730 54. Fransen M, Edmonds J. Reliability and validity of the EuroQol in patients with osteoarthritis of the knee.  
731 *Rheumatology(Oxford).* 1999;38(9):807-13.
- 732 55. Hurst NP, Jobanputra P, Hunter M, Lambert M, Lochhead A, Brown H. Validity of Euroqol--a generic  
733 health status instrument--in patients with rheumatoid arthritis. Economic and Health Outcomes Research  
734 Group. *BrJ Rheumatol.* 1994;33(7):655-62.
- 735 56. Losina E, Wright JJ, Thornhill TS, Katz JN. Can We Explain the Dramatic Increase in TKR Utilization  
736 Rates in US by Population Size and Obesity Epidemic Growth? *Osteoarthritis Cartilage.* 2010;18(Supplement  
737 2):S161.
- 738 57. Felson DT, Naimark A, Anderson J, Kazis L, Castelli W, Meenan RF. The prevalence of knee  
739 osteoarthritis in the elderly. The Framingham Osteoarthritis Study. *Arthritis Rheum.* 1987;30(8):914-8.
- 740 58. Lethbridge-Cejku M, Scott WW, Jr., Reichle R, Ettinger WH, Zonderman A, Costa P, et al. Association  
741 of radiographic features of osteoarthritis of the knee with knee pain: data from the Baltimore Longitudinal Study  
742 of Aging. *Arthritis Care Res.* 1995;8(3):182-8.
- 743 59. Sharma L, Song J, Felson DT, Cahue S, Shamiyeh E, Dunlop DD. The role of knee alignment in  
744 disease progression and functional decline in knee osteoarthritis. *JAMA.* 2001;286(2):188-95.
- 745 60. Moher D, Hopewell S, Schulz KF, Montori V, Gotzsche PC, Devereaux PJ, et al. CONSORT 2010  
746 explanation and elaboration: updated guidelines for reporting parallel group randomised trials. *Bmj.*  
747 2010;340:c869. Epub 2010/03/25. doi: 10.1136/bmj.c869. PubMed PMID: 20332511; PubMed Central PMCID:  
748 PMCPMC2844943.
- 749 61. Laird NM, Ware JH. Random-effects models for longitudinal data. *Biometrics.* 1982;38(4):963-74.
- 750 62. Council NR. Prevention and treatment of missing data in clinical trials: The National Academies Press;  
751 2014. Available from: [http://www.nap.edu/openbook.php?record\\_id=12955&page=R1](http://www.nap.edu/openbook.php?record_id=12955&page=R1).
- 752 63. Little RJA, Rubin DB. Statistical analysis with missing data. New York: John Wiley and Sons; 1987  
753 1987.
- 754 64. Wu MC, Bailey KR. Estimation and comparison of changes in the presence of informative right  
755 censoring: conditional linear model. *Biometrics.* 1989;45(3):939-55.
- 756 65. Conaway MR. Non-ignorable non-response models for time-ordered categorical response data. *Applied*  
757 *Statistics.* 1993;42:105-15.

- 758 66. Tubach F, Ravaud P, Martin-Mola E, Awada H, Bellamy N, Bombardier C, et al. Minimum clinically  
759 important improvement and patient acceptable symptom state in pain and function in rheumatoid arthritis,  
760 ankylosing spondylitis, chronic back pain, hand osteoarthritis, and hip and knee osteoarthritis: Results from a  
761 prospective multinational study. *Arthritis Care Res(Hoboken)*. 2012;64(11):1699-707. doi: 10.1002/acr.21747  
762 [doi].
- 763 67. Borm GF, Fransen J, Lemmens WA. A simple sample size formula for analysis of covariance in  
764 randomized clinical trials. *J Clin Epidemiol*. 2007;60(12):1234-8. doi: S0895-4356(07)00061-3  
765 [pii];10.1016/j.jclinepi.2007.02.006 [doi].  
766

## c.5. Statistical Analysis Plan

**c.5.1. Data Management.** The Data Management Group, part of the Coordinating Center, has primary responsibility for randomization, quality control, and analyses of data generated by the clinical centers. Data will be collected on hard-copy forms at each site and transferred to an electronic database. Our web-based management system will assure integrity and validity. Dynamic reports and periodic statistical analyses will monitor quality. A participant-based inventory system will track recruitment, retention, adherence, and missing data from entry through exit, close-out, and lock-down of final datasets. Our team developed a similar database for the IDEA and START studies (see Appendix F).

**c.5.2 Statistical Analyses** will be conducted and analyzed using intention-to-treat principles in full accordance with the CONSORT guidelines (60). We will monitor SAEs on a regular basis to maintain up-to-date safety information for reporting to the DSMB.

**c.5.3. Primary Aim.** The primary hypothesis of long-term reduced WOMAC pain at 18 months will be tested based on a two-tailed significance level of 0.05 using contrast statements from a repeated measures mixed linear model with time (6, 18 mos), randomization arm (D+E vs control), and the interaction, which adjusts the means at each time point for potential missing data bias (61). Intervention-effect estimates will be further adjusted for baseline pain values, BMI, county, and gender; analysis will match design, so the variance estimate will not be biased. An unstructured covariance matrix will be used to account for the correlation between repeated outcomes at 6 and 18 months. In the unlikely event the model does not converge, a first-order autoregressive (AR[1]) covariance structure will be fit instead. Maximum-likelihood techniques will estimate parameters, as in the IDEA trial (14). Preliminary analyses will be conducted to check the shape of the distributions and variances between groups and as a function of the covariates of the prespecified models. Regression diagnostics and residual plots will help to find appropriate transformations, if necessary. We will include exploratory analyses of subgroups, defined by gender, age (<70 vs ≥70 years), baseline BMI (27.0-34.9, 35-44.9, ≥45 kg/m<sup>2</sup>), clinic site, and race to determine any differential pain responses.

**c.5.4. Secondary Aim 2.** Repeated measures mixed linear models similar to Aim 1 will be used to analyze WOMAC function, 6-minute walk, and SF-36 physical subscale. Each outcome will be modeled separately, and 18-month effectiveness will be tested based on a two-tailed significance level of 0.05. The model will include the fixed effects study arm, time, time-group interaction, county, gender, baseline BMI, and baseline values of the outcome, and an unstructured covariance will be used assuming model convergence is not a problem (AR[1] otherwise). Analyses will be conducted to check the shape of the distributions and variances between groups and as a function of the covariates. Regression diagnostics and residual plots will help to find appropriate transformations, if necessary.

**c.5.5. Missing Data.** If missing data are related to outcomes, our results could be biased. We plan to account for missing data and conduct sensitivity analyses in accordance with the recommendations of the National Research Council (62). Our models will include variables from previous visits determined to predict loss to satisfy Little and Rubin's (63) conditions for data considered missing at random (MAR). If "informative censoring" occurs, we will compare analyses using subjects with complete data, multiple imputations, or explicit modeling of the censoring mechanism (64, 65).

**Table 7: Power estimates for WOMAC pain, assuming baseline N=820, correlation between BL and 18 months=0.4, and common group SD = 3.50.**

| 18 month Control Mean WOMAC Pain | 18 Month D+E WOMAC Pain (% difference from Control) | 18-Month Retention |     |     |     |
|----------------------------------|-----------------------------------------------------|--------------------|-----|-----|-----|
|                                  |                                                     | 70%                | 75% | 80% | 85% |
| 5.92                             | 5.15 (13%)                                          | 81%                | 84% | 86% | 88% |
|                                  | 5.03 (15%)                                          | 91%                | 92% | 94% | 95% |
|                                  | 4.91 (17%)                                          | 96%                | 97% | 97% | 98% |

## c.5.6. Sample Size and Power Calculations

### c.5.6.a. Primary Outcome Aim 1.

Based on ADAPT, we expect the control group to reduce pain by approximately 10%; therefore, a 15% between group difference would require a 25% within group improvement from baseline, exceeding a minimally clinically important improvement (MCII) of 20% (2) (66). A total sample of 820 (410/group) will

provide 94% statistical power to detect differences ≥15% in pain at the 2-sided 0.05 significance level with 80% retention (2-sample t-test, Nquery Advisor). In IDEA, the D+E arm reduced pain by an average of 51%, which

suggests the current assumptions are conservative. A total sample of 820 (410/group) will provide 94% statistical power to detect differences  $\geq 15\%$  in pain at the 2-sided 0.05 significance level with 80% retention at 18 months (2-sample t-test, Nquery Advisor). This approach utilizes the conditional variance approach of Borm et al. (67) for the estimation of power for ANCOVA models using group standard deviation  $\sigma = 3.50$ , Pearson correlation between baseline and 18-month pain score of  $\rho = 0.4$  for a conditional standard deviation  $\sigma_c = 3.21$

( $\sigma_c = \sqrt{1-\rho^2} \times \sigma$ ), and 18-month treatment WOMAC pain means ~D+E = 5.03 vs E-only control = 5.92 ( $\Delta = -0.887$ ). Variations of anticipated power due to modifications in retention and treatment effect are presented in Table 7. Correlation between baseline and 18 month pain values are estimated from the IDEA trial, while anticipated treatment effects and standard deviation for pain were obtained using weighted averages of D+E and non-D+E treatments from the ADAPT and IDEA studies, with some attenuation of the anticipated treatment effect due to the pragmatic nature of WE-CAN (Table 7).

**c.5.6.b. Secondary Outcomes.** *Aim 2.* Our sample size provides the ability to detect a moderate effect size of 0.234 at 85% power with relevant detectable differences. However, all estimates from IDEA and ADAPT were collected under rigorously controlled conditions; therefore the estimates for the pragmatic trial are conservative with respect to anticipated effect sizes. We assume in Table 8 a total baseline sample size of N=820, 80% retention at 18 months, and a 0.05 level of significance for all tests. The detectable and % differences from

**Table 8: Detectable absolute and relative (%) differences for secondary outcomes, n = 410/group, 80% retention, 85% statistical power,  $\alpha = 0.05$ . Correlation between baseline and 18M values is  $\rho$ .**

| Variable                     | Anticipated 18m Control mean | Standard Deviation | $\rho$ | D+E Mean (% change from Control) |
|------------------------------|------------------------------|--------------------|--------|----------------------------------|
| WOMAC Function               | 17.5                         | 11.5               | 0.6    | 15.3 (-12.3%)                    |
| Mobility: 6-Minute Walk (m)  | 509                          | 90.7               | 0.7    | 524 (3.0%)                       |
| SF-36 Physical Score (0-100) | 42.0                         | 10.1               | 0.5    | 44.1 (4.9%)                      |

control aim to achieve 85% power. The mean differences in WOMAC function for D+E compared to D only and E only in IDEA were -3.3 and -4.3, respectively. Likewise, the differences in 6-minute walk distance for the D+E group versus D only in IDEA and ADAPT (41.5

and 42.1, respectively) indicate that the mean difference to achieve 85% power (15.2 m) is modest. IDEA indicated that SF-36 physical subscale was significantly improved in the D+E arm, with a difference of 2.8 (Table 8).

854 **18. Appendices**

855  
856  
857 **A. Comparison of IDEA and WE-CAN**

858  
859 **B. Intervention Sites**

860  
861 **C. Organizational Structure, Committees, Committee Meeting**  
862 **Schedules**

863  
864 **D. Diet-induced Weight Loss Group Session Topics**

865  
866 **E. Attention Control Group Topics**

867  
868 **F. Data Management and Quality Control**

869  
870 **G. Manual of Operations**

871  
872

873

874

875

876

## References:

- 877  
878 **The ARIC investigators.** The Atherosclerosis Risk in Communities (ARIC) Study: design and objectives.  
879 Am.J.Epidemiol. 1989 Apr;129(4):687-702.  
880
- 881 **Baker DW, Williams MV, Parker RM, Gazmararian JA, Nurss J,** Development of a brief test to measure  
882 functional health literacy, Patient Educ Couns. 1999 Sep;38(33-42)  
883
- 884 **Bauer UE, Briss PA, Goodman RA, Bowman BA.** Prevention of chronic disease in the 21st century:  
885 elimination of the leading preventable causes of premature death and disability in the USA. Lancet.  
886 2014;384(9937):45-52  
887
- 888 **Bhaskaran K, Douglas I, Forbes H, dos-Santos-Silva I, Leon DA, Smeeth L.** Body-mass index and risk of  
889 22 specific cancers: a population-based cohort study of 5.24 million UK adults. Lancet. 2014;384(9945):755-  
890 65.  
891
- 892 **Brooks R** (1996). EuroQol: the current state of play. Health Policy 37(1):53-72.  
893
- 894 **Burnam, M.A., Well, K.B., Leake, B., Landsverk, J.** (1988). Development of a brief screening instrument  
895 for detecting depressive disorders. Medical Care, 26, 775-789.  
896
- 897 **Campbell PT.** Obesity: a certain and avoidable cause of cancer. Lancet. 2014;384(9945):727-8.  
898
- 899 **Clark, M.M., Abrams, D.B., Niaura, R.S., Eaton, C.A., & Rossi, J.S.** (1991). Self-efficacy in weight  
900 management. *Journal of Consulting and Clinical Psychology*, 59, 739-744.  
901
- 902 **Cohen, S., Kamarck, T., & Mermelstein, R.** (1983). A global measure of perceived stress. Journal of Health  
903 and Social Behavior, 24, 385-396.  
904
- 905 **Conaway MR.** Non-ignorable non-response models for time-ordered categorical response data. *Applied*  
906 *Statistics* 42: 105-115, 1993.  
907
- 908 **Diener E, Emmons RA, Larsen RJ and Griffin S.** The Satisfaction With Life Scale. *J Pers Assess* 49: 71-75,  
909 1985.  
910
- 911 **The EuroQol Group** (1990). EuroQol-a new facility for the measurement of health-related quality of life.  
912 Health Policy 16(3):199-208.  
913
- 914 **Fortney JC, Pyne JM, Mouden SB, Mittal D, Hudson TJ, Schroeder GW, et al.** Practice-based versus  
915 telemedicine-based collaborative care for depression in rural federally qualified health centers: a pragmatic  
916 randomized comparative effectiveness trial. AmJ Psychiatry. 2013;170(4):414-25.  
917
- 918 **Gooch K, Marshall DA, Faris PD, Khong H, Wasylak T, Pearce T, et al.** Comparative effectiveness of  
919 alternative clinical pathways for primary hip and knee joint replacement patients: a pragmatic randomized,  
920 controlled trial. OsteoarthritisCartilage. 2012;20(10):1086-94.  
921
- 922 **Guralnik JM, Simonsick EM, Ferrucci L, Glynn RJ, Berkman LF, Blazer DG, Scherr PA, Wallace RB.** A  
923 short physical performance battery assessing lower extremity function: association with self-reported disability  
924 and prediction of mortality and nursing home admission. J Gerontol. 1994 Mar;49(2):M85-M94.  
925



- 926 **Hawker GA, Davis AM, French MR, Cibere J, Jordan JM, March MB, Suarez-Almazor M, Katz JN,**  
 927 **Dieppe P.** Development and preliminary psychometric testing of a new OA pain measure – an  
 928 OARSI/OMERACT initiative. *Osteoarthritis and Cartilage* 16: 409-14, 2008.
- 929  
 930 **Little RJA and Rubin DB.** *Statistical analysis with missing data.* New York: John Wiley and Sons, 1987.  
 931
- 932 **McAuley E and Mihalko SL.** Measuring Exercise-Related Self-Efficacy. In: *Advances in Sport*  
 933 *and Exercise Psychology Measurement*, edited by J.L.Duda. Morgantown, W.V: Fitness  
 934 Information Technology, Inc., 1998, p. 371-389.
- 935  
 936 **McAuley E, Mihalko S, and Rosengren.** Self Efficacy and Balance Correlates of Fear of Falling in the  
 937 Elderly. *Journal of Aging and Physical Activity.* 5: 329-240. 1997.
- 938  
 939 **Messier, S.P. et al.** Effects of intensive diet and exercise on knee joint loads, inflammation, and clinical  
 940 outcomes among overweight and obese adults with knee osteoarthritis. *JAMA* 310: 1263-1273. 2013.
- 941  
 942 **Messier SP, Loeser RF, Miller GD, Morgan TM, Rejeski WJ, Sevick MA, Ettinger WH, Jr., Pahor M,**  
 943 **Williamson JD.** Exercise and dietary weight loss in overweight and obese older adults with knee osteoarthritis:  
 944 the Arthritis, Diet, and Activity Promotion Trial. *Arthritis Rheum.* 2004 May;50(5):1501-10.
- 945  
 946 **Nasreddine ZS, Phillips NA, Bedirian V, Charbonneau S, Whitehead V, Collin I, Cummings JL,**  
 947 **Chertkow H.** The Montreal Cognitive Assessment, MoCA: a brief screening tool for mild cognitive  
 948 impairment. *J.Am.Geriatr.Soc.* 2005 Apr;53(4):695-9.
- 949  
 950 **National Rural Health Association.** What's different about rural health care? : National Rural Health  
 951 Association; 2014
- 952  
 953 **Penninx BW, Messier SP, Rejeski WJ, Williamson JD, DiBari M, Cavazzini C, Applegate B, Pahor M**  
 954 **Arch.Intern.Med.** 2001 Oct 22;161(19):2309
- 955  
 956 **Riebe D, Franklin B, Thompson P, Garber C, Whitfield G, Magal M, Pescatello L.** (2015). Updating  
 957 ACSM's Recommendations for Exercise Preparticipation Health Screening. *Medicine and Science in Sports*  
 958 *and Exercise.* 2015 Nov; 47 (11) 2473-9.
- 959  
 960 **Roos, E. M. and L. S. Lohmander.** (2003). "Knee injury and Osteoarthritis Outcome Score  
 961 (KOOS): from joint injury to osteoarthritis." *Health Qual Life Outcomes* 1: 64.
- 962  
 963 **Schmidt B, Wenitong M, Esterman A, Hoy W, Segal L, Taylor S, et al.** Getting better at  
 964 chronic care in remote communities: study protocol for a pragmatic cluster randomised controlled of  
 965 community based management. *BMC Public Health.* 2012;12:1017.
- 966  
 967 **Sullivan M, Bishop S and Pivik J.** The Pain Catastrophizing Scale: Development and  
 968 Validation. *Psychological Assessment.* 7: 524-532, 1995.
- 969  
 970 **Thompson FE et al.,** *J American Dietetic Association* 2002, vol 102, pp 212-225
- 971  
 972 **United States Department of Agriculture.** Rural america at a glance: Economic Research  
 973 Service; 2013 [updated 11/1/2013]

- 974 **Ware JE, Jr., Sherbourne CD.** The MOS 36-item short-form health survey (SF-36). I. Conceptual framework  
975 and item selection. *Med.Care* 1992 Jun;30(6):473-83.
- 976
- 977
- 978 **Washburn, R. A., Smith, K. W., Jette, A. M., & Janney, C. A.** (1993). The Physical Activity Scale for the  
979 Elderly (PASE): development and evaluation. *Journal of Clinical Epidemiology*, 46(2), 153–162.
- 980
- 981 **Watson D, Clark LA and Tellegen A.** Development and validation of brief measures of positive and negative  
982 affect: the PANAS scales. *J Pers Soc Psychol* 54: 1063-1070, 1988.
- 983
- 984 **Wu MC and Bailey KR.** Estimation and comparison of changes in the presence of informative right censoring:  
985 conditional linear model. *Biometrics* 45: 939-955, 1989.
- 986

987  
988  
989  
990
