# Supplementary material
Source: PubMed Central journal article supplement (PMC9856237)
Supplement: jama-e2221893-s003.pdf [file jama-e2221893-s003.pdf]

Messier SP, Beavers DP, Queen K, et al. Effect of diet and exercise on knee pain in patients with osteoarthritis and overweight or obesity: a randomized clinical trial. *JAMA*. Published December 13, 2022. doi:10.1001/jama.2022.21893

## Data Sharing Statement

### Data

**Data available:** Yes

**Data types:** Deidentified participant data, Data dictionary

**How to access data:** Address all inquiries regarding data sharing to Dr. Stephen P. Messier at [messier@wfu.edu](mailto:messier@wfu.edu)

**When available:** With publication

### Supporting Documents

**Document types:** Informed consent form

**How to access documents:** Address all inquiries to Dr. Stephen P. Messier at [messier@wfu.edu](mailto:messier@wfu.edu)

**When available:** With publication

### Additional Information

**Who can access the data:** Address all inquiries regarding data sharing to Dr. Stephen P. Messier at [messier@wfu.edu](mailto:messier@wfu.edu)

**Types of analyses:** The publications and presentations committee of the WE-CAN clinical trial will review each request.

**Mechanisms of data availability:** Without investigator support unless the request is deemed extensive by the P&P committee.
